# Supplementary material for: Mapping the planet’s critical natural assets for people
Source: Research Square preprint supplement (doi:10.21203/rs.3.rs-1102108/v1), 2021-11-22
Supplement: Supplementary file 4 [file be8b167c72b3007c3e2c01ce.xlsx]

## Sheet: Table S1. Land
Country (ranked by land area)	Total area (sq km)	Area of land (sq km)	Area of EEZ (sq km)	% of total area that is local critical natural assets (LCNA)	% of land that is natural assets	% of land that is LCNA	% of natural assets that are LCNA	% eez that is LCNA	% of land critical for global climate (GCNA)	% overlap between LCNA and GCNA	% of LCNA not over- lapping with GCNA	% of GCNA not over- lapping with LCNA	Total % of land that contains LCNA and GCNA
Global	274470564	134761492	139709072	0.272642	0.639456	0.304175	0.475678	0.242226	0.385268	0.237455	0.0626337	0.143451	0.44354	40991076
Russia	24615504	16924348	7691156	0.18526	0.861994	0.17825	0.206788	0.200684	0.35774	0.149434	0.0265192	0.20407	0.380022	3016772
Canada	15661972	9917508	5744464	0.129595	0.879692	0.106901	0.121521	0.168776	0.277687	0.0884178	0.0167106	0.157257	0.262386	1060192
United States of America	21628792	9467504	12161288	0.24688	0.757518	0.373709	0.493334	0.148145	0.528844	0.341412	0.0299445	0.180815	0.552172	3.53809e+06
China	10701884	9393892	1307992	0.292522	0.512536	0.253647	0.494887	0.571719	0.381235	0.200248	0.0507428	0.179958	0.430949	2382736
Brazil	12222380	8523920	3698460	0.387683	0.746638	0.459635	0.615607	0.221852	0.705004	0.424842	0.0335433	0.280017	0.738402	3917896
Australia	16745092	7723376	9021716	0.234683	0.871111	0.243787	0.279857	0.22689	0.104757	0.0561547	0.185728	0.0420857	0.283968	1882856
India	5503556	3165956	2337600	0.189262	0.285529	0.193742	0.678539	0.183195	0.199136	0.15349	0.0350302	0.0455913	0.234112	613380
Argentina	3863420	2790952	1072468	0.500429	0.713805	0.441581	0.61863	0.653573	0.230473	0.187707	0.251544	0.0425145	0.481765	1232432
Kazakhstan	2826860	2712492	114368	0.337713	0.642577	0.351843	0.547551	0.00258814	0.552878	0.308855	0.0375212	0.241952	0.588328	954372
Democratic Republic of the Congo	2354184	2340724	13460	0.703136	0.882438	0.705734	0.799754	0.251412	0.868044	0.701574	0.00399876	0.16647	0.872043	1651928
Algeria	2448776	2317420	131356	0.0414133	0.0514503	0.028209	0.548276	0.274369	0.0304925	0.0180269	0.00899103	0.0124639	0.0394818	65372
Greenland	2142460	2142460	0	0.00552076	0.166295	0	0		0				0	0
Mexico	5168872	1966228	3202644	0.289645	0.811123	0.491489	0.605937	0.165724	0.329893	0.242525	0.245384	0.0873327	0.575242	966380
Saudi Arabia	2155684	1930412	225272	0.0754619	0.0403064	0.021728	0.539071	0.535921	0.00012847	9.32443e-05	0.00424987	2.90094e-05	0.00437212	41944
Indonesia	7952676	1892408	6060268	0.370513	0.630904	0.32962	0.522457	0.383282	0.580048	0.278511	0.0330119	0.301472	0.612995	623776
Sudan	1950240	1867248	82992	0.201951	0.267435	0.185554	0.693829	0.57085	0.145288	0.119772	0.0648419	0.02534	0.209954	346476
Libya	1995616	1630216	365400	0.0452492	0.0260039	0.00847986	0.326099	0.209294	0.000306708	0.000252727	0.00171511	5.39806e-05	0.00202182	13824
Iran	1843292	1627164	216128	0.126311	0.147874	0.0881018	0.595787	0.413977	0.11056	0.0729736	0.0123429	0.0369207	0.122237	143356
Mongolia	1563920	1563920	0	0.29724	0.493928	0.29724	0.601789		0.292583	0.200749	0.0960203	0.0917771	0.388547	464860
Peru	2158176	1298040	860136	0.392148	0.88449	0.571582	0.646227	0.121362	0.753487	0.488044	0.0806262	0.265443	0.834113	741936
Chad	1273508	1273508	0	0.214736	0.311963	0.214736	0.688337		0.145127	0.121629	0.0927108	0.0234942	0.237834	273468
Mali	1259524	1259524	0	0.185473	0.234053	0.185473	0.79244		0.0412632	0.0385225	0.145169	0.00274072	0.186432	233608
Angola	1750540	1251856	498684	0.517116	0.916511	0.658763	0.718772	0.161537	0.893649	0.648081	0.00966565	0.245568	0.903315	824676
South Africa	2774500	1224140	1550360	0.314882	0.848341	0.592877	0.698866	0.0953817	0.126832	0.09395	0.498276	0.0328819	0.625108	725764
Niger	1187828	1187828	0	0.18173	0.242894	0.18173	0.748187		0.00127965	0.00126281	0.174318	1.68375e-05	0.175598	215864
Colombia	1866912	1142680	724232	0.335907	0.873175	0.47885	0.5484	0.110373	0.855354	0.464112	0.0126895	0.391242	0.868044	547172
Ethiopia	1134556	1134556	0	0.472756	0.694252	0.472756	0.680957		0.615289	0.43114	0.0410205	0.18415	0.65631	536368
Bolivia	1092884	1092884	0	0.605407	0.845634	0.605407	0.715921		0.828289	0.604229	0.000995531	0.22406	0.829285	661640
Mauritania	1216088	1041976	174112	0.132185	0.166461	0.116851	0.701974	0.223948	0.000249526	0.000207298	0.112279	4.22275e-05	0.112529	121756
Egypt	1250212	1006044	244168	0.025938	0.031927	0.00710506	0.22254	0.103535	0.000870737	0.000644107	0.00230209	0.000210726	0.00315692	7148
United Republic of Tanzania	1190740	947488	243252	0.396903	0.713782	0.45758	0.641065	0.160558	0.632042	0.432888	0.021328	0.199074	0.65329	433552
Venezuela	1395436	918704	476732	0.50161	0.839287	0.60264	0.718039	0.306915	0.798124	0.570882	0.0295329	0.227172	0.827588	553648
Nigeria	1093508	913232	180276	0.270246	0.352489	0.270284	0.766788	0.270053	0.312508	0.253802	0.015317	0.0587058	0.327825	246832
Pakistan	1101288	875924	225364	0.210179	0.381622	0.207255	0.543091	0.221544	0.162589	0.127084	0.0767053	0.0354369	0.239226	181540
Namibia	1391648	826760	564888	0.462068	0.780822	0.564527	0.722991	0.312111	0.339596	0.252886	0.310688	0.0866999	0.650273	466728
Mozambique	1361736	792764	568972	0.430791	0.84631	0.618353	0.730646	0.169456	0.729307	0.531321	0.0849433	0.197981	0.814245	490208
Turkey	1043536	781076	262460	0.340377	0.411893	0.306541	0.744225	0.441073	0.363924	0.270176	0.0316538	0.0937374	0.395567	239432
Zambia	756488	756488	0	0.683411	0.830284	0.683411	0.823105		0.81734	0.682084	0.001195	0.135257	0.818535	516992
Chile	4414404	737852	3676552	0.0952727	0.689125	0.247676	0.359406	0.0646867	0.367055	0.125283	0.112234	0.172539	0.410055	182748
Myanmar	1166872	666444	500428	0.466694	0.656343	0.486228	0.740814	0.440679	0.642899	0.474152	0.00555185	0.168746	0.648451	324044
Afghanistan	643804	643804	0	0.276631	0.483967	0.276631	0.57159		0.458282	0.272692	0.00344825	0.185529	0.461668	178096
France	10744036	637004	10107032	0.0579008	0.521874	0.336456	0.644708	0.0403446	0.461259	0.284356	0.0397988	0.176853	0.501008	214324
South Sudan	630920	630920	0	0.790572	0.946187	0.790572	0.835536		0.946053	0.790471	8.87593e-05	0.155582	0.946142	498788
Central African Republic	622068	622068	0	0.808156	0.979044	0.808156	0.825454		0.979025	0.80815	0	0.170875	0.979025	502728
Madagascar	1842036	596124	1245912	0.32395	0.849494	0.650408	0.765642	0.167752	0.644477	0.484812	0.15941	0.159665	0.803886	387724
Morocco	874924	593764	281160	0.219928	0.224844	0.160198	0.712488	0.346066	0.0717255	0.066262	0.0826119	0.00546345	0.154337	95120
Kenya	754488	589712	164776	0.398066	0.719137	0.481638	0.669745	0.0989707	0.658118	0.461961	0.0182258	0.196062	0.676249	284028
Botswana	581924	581924	0	0.541775	0.923818	0.541775	0.586452		0.566534	0.294753	0.246974	0.271781	0.813508	315272
Ukraine	707652	571372	136280	0.232838	0.200157	0.16299	0.814312	0.525682	0.180282	0.152251	0.0060416	0.0279538	0.186246	93128
Thailand	818032	517484	300548	0.369179	0.314398	0.224509	0.714093	0.618271	0.295174	0.209436	0.00949981	0.0857379	0.304674	116180
Spain	1517452	507476	1009976	0.275346	0.437033	0.355225	0.812809	0.23521	0.320606	0.251488	0.078183	0.0691185	0.398789	180268
Somalia	1262120	474972	787148	0.294026	0.830078	0.610638	0.735639	0.102979	0.583933	0.477965	0.129608	0.10596	0.713533	290036
Turkmenistan	532768	471460	61308	0.104488	0.209944	0.118008	0.562093	0.000521955	0.133008	0.100225	0.0166546	0.0327833	0.149663	55636
Papua New Guinea	2887076	468136	2418940	0.67206	0.863809	0.522677	0.605084	0.70097	0.847976	0.497753	0.0106977	0.348412	0.856862	244684
Cameroon	482652	467344	15308	0.627359	0.841402	0.624662	0.742406	0.709694	0.830532	0.617601	0.00617104	0.212931	0.836703	291932
Yemen	986256	455628	530628	0.141744	0.161307	0.099274	0.615435	0.178211	0.000254594	0.00019314	0.0724275	5.26746e-05	0.0726733	45232
Uzbekistan	448200	448200	0	0.112985	0.231388	0.112985	0.488294		0.1361	0.101214	0.0107184	0.0345828	0.146515	50640
Sweden	600012	444624	155388	0.435665	0.899457	0.330472	0.367413	0.736659	0.786165	0.309349	0.0143042	0.476564	0.800218	146936
Iraq	439772	438576	1196	0.0175909	0.0297964	0.0153406	0.514845	0.842809	0.0114553	0.00922075	0.0029003	0.00222538	0.0143464	6728
Paraguay	401704	401704	0	0.625894	0.770528	0.625894	0.812292		0.766096	0.623912	0.00182224	0.142184	0.767919	251424
Zimbabwe	391384	391384	0	0.495697	0.623449	0.495697	0.795089		0.613127	0.492039	0.00328067	0.121088	0.616407	194008
Norway	2391520	380476	2011044	0.425137	0.747264	0.257236	0.344237	0.456903	0.373164	0.19689	0.0366699	0.172426	0.405986	97872
Japan	4669500	374096	4295404	0.173201	0.680574	0.482988	0.709678	0.14622	0.262179	0.165829	0.29524	0.0961785	0.557247	180684
Germany	413740	357144	56596	0.434891	0.469032	0.383375	0.817374	0.759983	0.463197	0.376957	0.00310239	0.0862397	0.466299	136920
Republic of the Congo	381200	347180	34020	0.649003	0.898715	0.682816	0.759769	0.303939	0.891941	0.680154	0.00226972	0.211786	0.89421	237060
Finland	412496	331656	80840	0.484165	0.909038	0.413959	0.455381	0.772192	0.836312	0.388366	0.0192247	0.44744	0.855031	137292
Vietnam	1086328	330732	755596	0.411758	0.505146	0.388435	0.768956	0.421966	0.426895	0.326294	0.0496716	0.100589	0.476555	128468
Malaysia	844336	330060	514276	0.602144	0.656741	0.445543	0.678415	0.70265	0.565097	0.363376	0.047555	0.201515	0.612446	147056
Ivory Coast	495728	322812	172916	0.278733	0.474394	0.373034	0.786339	0.102686	0.468409	0.368735	0.00314734	0.0996741	0.471556	120420
Poland	342868	312896	29972	0.367885	0.390916	0.32251	0.825011	0.841585	0.383399	0.315312	0.00529249	0.0680865	0.388691	100912
Oman	872260	312840	559420	0.114269	0.0613221	0.0401227	0.654295	0.155733	0	0	0.00599668	0	0.00599668	12552
Italy	838760	301348	537412	0.381368	0.396684	0.317042	0.79923	0.417438	0.329745	0.258094	0.0498427	0.0716248	0.379561	95540
Philippines	2277832	295028	1982804	0.29995	0.357688	0.272286	0.761239	0.304066	0.254172	0.157016	0.0672479	0.0971569	0.32142	80332
Burkina Faso	274488	274488	0	0.225831	0.276763	0.225831	0.815975		0.0570808	0.04739	0.177815	0.00969077	0.234896	61988
New Zealand	6105660	268704	5836956	0.0906922	0.899131	0.604978	0.672848	0.0670171	0.628975	0.369998	0.213797	0.220183	0.803978	162560
Gabon	464852	261768	203084	0.457935	0.947419	0.660722	0.697392	0.196549	0.939106	0.655695	0.00267412	0.282449	0.940818	172956
Ecuador	1351112	256720	1094392	0.162799	0.817576	0.494469	0.604799	0.084997	0.762901	0.453849	0.0354472	0.309037	0.798333	126940
Guinea	348736	245884	102852	0.521162	0.76667	0.633616	0.826451	0.252324	0.630297	0.525028	0.107726	0.105269	0.738023	155796
Uganda	243632	243632	0	0.319236	0.50724	0.319236	0.629358		0.362415	0.305477	0.00656728	0.0569383	0.368983	77776
United Kingdom	6127288	243144	5884144	0.131705	0.636051	0.479189	0.753382	0.117347	0.516435	0.407314	0.0511795	0.10894	0.567433	116512
Ghana	469140	240176	228964	0.309954	0.515972	0.430568	0.834479	0.183435	0.438295	0.368996	0.0562088	0.0692992	0.494504	103412
Romania	265976	236388	29588	0.357656	0.424472	0.351659	0.828463	0.40557	0.40975	0.344214	0.00614244	0.065401	0.415757	83128
Laos	229312	229312	0	0.68525	0.814087	0.68525	0.84174		0.803865	0.677435	0.00680296	0.12643	0.810668	157136
Guyana	352220	212656	139564	0.342593	0.981773	0.407042	0.414599	0.24439	0.979065	0.403224	0.00221955	0.575841	0.981284	86560
Belarus	207080	207080	0	0.383407	0.462816	0.383407	0.828422		0.459108	0.380722	0.00239521	0.0783852	0.461503	79396
Kyrgyzstan	199084	199084	0	0.429748	0.6245	0.429748	0.688147		0.553013	0.414719	0.012437	0.138233	0.565389	85556
Senegal	356688	197232	159456	0.388732	0.67413	0.531476	0.788387	0.212171	0.0426908	0.0311309	0.496735	0.0114991	0.539365	104824
Syria	196616	186328	10288	0.0565163	0.0645743	0.0384269	0.59508	0.384137	0.0279078	0.0188914	0.00824353	0.00901636	0.0361513	7160
Cambodia	231168	182144	49024	0.452052	0.554902	0.417977	0.753245	0.578655	0.452543	0.340148	0.0741831	0.112395	0.526726	76132
Uruguay	321248	177824	143424	0.498008	0.797305	0.669606	0.839836	0.285252	0.0653005	0.0561679	0.611189	0.00913263	0.676489	119072
Somaliland	168536	168536	0	0.513908	0.762211	0.513908	0.674233		0.0739071	0.0615892	0.44489	0.0123178	0.518797	86612
Tunisia	256980	157060	99920	0.355452	0.118757	0.0805807	0.678533	0.78751	0.0347128	0.0311983	0.0342544	0.00351458	0.0689673	12656
Nepal	147612	147612	0	0.517275	0.653605	0.517275	0.791418		0.652115	0.516354	0.000867138	0.135761	0.652982	76356
Suriname	280288	146080	134208	0.361814	0.991703	0.421961	0.425491	0.296346	0.978834	0.415444	0.00580504	0.563226	0.984474	61640
Tajikistan	142464	142464	0	0.335748	0.536585	0.335748	0.625713		0.363825	0.311377	0.0223214	0.0523922	0.386091	47832
Bangladesh	250524	137544	112980	0.300283	0.23431	0.177921	0.75934	0.449248	0.159193	0.115541	0.0259117	0.0435352	0.184988	24472
Greece	615444	131648	483796	0.369275	0.544391	0.446159	0.819557	0.348353	0.416717	0.338813	0.0885695	0.0779047	0.505287	58736
Nicaragua	344648	129436	215212	0.393097	0.670818	0.434099	0.647118	0.368437	0.385148	0.237183	0.187336	0.147687	0.572206	56188
Eritrea	202040	123240	78800	0.343338	0.384615	0.230217	0.598565	0.520254	0.117527	0.107335	0.119929	0.0101915	0.237455	28372
North Korea	237080	122588	114492	0.407019	0.640715	0.488237	0.762019	0.320057	0.257676	0.190459	0.28887	0.0670212	0.54635	59852
Malawi	120160	120160	0	0.251232	0.47723	0.251232	0.526437		0.173136	0.139647	0.0978029	0.0334887	0.270939	30188
Benin	152516	116756	35760	0.374623	0.578437	0.455514	0.787491	0.110515	0.496043	0.404707	0.047929	0.0913358	0.543972	53184
Honduras	324760	112912	211848	0.414497	0.76123	0.514454	0.675819	0.361221	0.523948	0.314617	0.194523	0.209296	0.718436	58088
Bulgaria	147612	112852	34760	0.317291	0.411867	0.321837	0.781411	0.302532	0.399709	0.314607	0.00591926	0.0851026	0.405629	36320
Cuba	464372	110404	353968	0.342157	0.504656	0.383609	0.760141	0.329228	0.182204	0.115431	0.252636	0.0651063	0.433173	42352
Guatemala	220676	109388	111288	0.300187	0.717666	0.492888	0.686793	0.110776	0.557209	0.365671	0.125754	0.191538	0.682963	53916
Iceland	861860	102000	759860	0.390718	0.683451	0.21698	0.317478	0.414039	0.000117647	3.92157e-05	0.163608	7.84314e-05	0.163725	22132
South Korea	530172	98696	431476	0.566186	0.511551	0.392681	0.767628	0.605874	0.109792	0.073235	0.303234	0.0363541	0.412823	38756
Liberia	349380	95896	253484	0.137077	0.459706	0.308417	0.670901	0.072257	0.452532	0.300284	0.0059648	0.152248	0.458497	29576
Hungary	93076	93076	0	0.228802	0.27629	0.228802	0.828123		0.263827	0.222141	0.00485625	0.0416864	0.268684	21296
Portugal	1823500	91544	1731956	0.102857	0.435288	0.37228	0.85525	0.0886166	0.247313	0.211046	0.079044	0.0362667	0.326357	34080
Western Sahara	90700	90700	0	0.000220507	8.82029e-05	8.82029e-05	1		0	0	0	0	0	8
Jordan	89236	89140	96	0.0154198	0.0238726	0.0145389	0.609023	0.833333	0.00807718	0.00749383	0.000358986	0.000583352	0.00843617	1296
Azerbaijan	167012	86320	80692	0.132374	0.341103	0.25468	0.746638	0.00153671	0.257136	0.217006	0.0271084	0.0401297	0.284245	21984
Austria	83992	83992	0	0.591675	0.713735	0.591675	0.828985		0.711734	0.590675	0.000761977	0.121059	0.712496	49696
Czechia	78736	78736	0	0.38986	0.456513	0.38986	0.853995		0.454379	0.388031	0.00147328	0.0663483	0.455852	30696
Republic of Serbia	77532	77532	0	0.350771	0.409844	0.350771	0.855866		0.404581	0.345973	0.00433369	0.0586081	0.408915	27196
Panama	407864	74964	332900	0.203087	0.671842	0.441972	0.657851	0.149294	0.595166	0.375007	0.0589616	0.21589	0.649859	33132
Sierra Leone	233772	72084	161688	0.151772	0.321181	0.260141	0.809952	0.103459	0.232229	0.180345	0.0771322	0.0518839	0.309361	18752
United Arab Emirates	129352	71384	57968	0.356423	0.0472375	0.040065	0.848161	0.745998	0.00033621	0.00011207	0.00296985	0.000168105	0.00325003	2860
Georgia	92524	69564	22960	0.438157	0.607441	0.418377	0.688754	0.498084	0.605831	0.414352	0.000517509	0.191478	0.606348	29104
Ireland	495468	69244	426224	0.459582	0.900295	0.73849	0.820276	0.41427	0.751487	0.64976	0.065623	0.101727	0.817111	51136
Sri Lanka	603828	66740	537088	0.129977	0.492119	0.394606	0.801851	0.097094	0.324783	0.253102	0.122925	0.0716812	0.447708	26336
Lithuania	71656	64796	6860	0.40527	0.415396	0.355763	0.856442	0.872886	0.409717	0.350145	0.00425952	0.0595716	0.413976	23052
Latvia	92552	64364	28188	0.664275	0.692126	0.579641	0.837479	0.857528	0.664347	0.555279	0.0210055	0.109067	0.685352	37308
Togo	72892	57348	15544	0.358997	0.497942	0.422683	0.848858	0.124035	0.452187	0.386483	0.0347353	0.0657041	0.486922	24240
Croatia	110564	55028	55536	0.60754	0.542924	0.432943	0.797429	0.780539	0.48608	0.377626	0.0412881	0.108454	0.527368	23824
Bosnia and Herzegovina	51832	51820	12	0.571539	0.697646	0.57144	0.819097	1	0.686993	0.56511	0.00586646	0.121883	0.69286	29612
Costa Rica	637336	51480	585856	0.140121	0.719037	0.555245	0.772207	0.103643	0.526884	0.390521	0.156255	0.136364	0.683139	28584
Dominican Republic	401300	48768	352532	0.144082	0.646982	0.490075	0.75748	0.0962182	0.33645	0.229413	0.251394	0.107037	0.587844	23900
Slovakia	48488	48488	0	0.446049	0.523098	0.446049	0.852705		0.520871	0.444729	0.00115492	0.0761426	0.522026	21628
Estonia	82040	45732	36308	0.686884	0.727456	0.578938	0.79584	0.822849	0.587335	0.473979	0.0895653	0.113356	0.6769	26476
Denmark	2670696	42528	2628168	0.313274	0.217175	0.206734	0.951927	0.314998	0.0640519	0.0541761	0.0666855	0.00987585	0.130737	8792
Switzerland	41392	41392	0	0.567743	0.71666	0.567743	0.792206		0.700522	0.563394	0.00106301	0.137128	0.701585	23500
Bhutan	40488	40488	0	0.709148	0.916025	0.709148	0.774159		0.915728	0.709148	0	0.20658	0.915728	28712
Netherlands	182376	37300	145076	0.402312	0.464772	0.451046	0.970466	0.389782	0.430777	0.369008	0.0218767	0.0617694	0.452654	16824
Taiwan	467724	36420	431304	0.218933	0.624272	0.397144	0.636172	0.203884	0.233498	0.0959912	0.289951	0.137507	0.523449	14464
Moldova	33204	33204	0	0.070353	0.0885435	0.070353	0.794558		0.079629	0.0643296	0.0048187	0.0152994	0.0844477	2336
Guinea-Bissau	140552	33048	107504	0.290626	0.734447	0.567538	0.772742	0.205499	0.383926	0.255144	0.298838	0.128782	0.682764	18756
Belgium	34128	30636	3492	0.374473	0.376942	0.323019	0.856945	0.825888	0.357618	0.304348	0.0127954	0.0532707	0.370414	9896
Lesotho	30232	30232	0	0.635353	0.7371	0.635353	0.861964		0.0412808	0.0398254	0.595528	0.00145541	0.636809	19208
Armenia	29644	29644	0	0.288625	0.392929	0.288625	0.734547		0.359196	0.286196	0.000809607	0.0729996	0.360005	8556
Albania	40520	28352	12168	0.492004	0.466986	0.385581	0.82568	0.739974	0.410976	0.336907	0.0423251	0.0740688	0.453301	10932
Solomon Islands	1643080	27356	1615724	0.482085	0.916947	0.494809	0.539627	0.481869	0.830385	0.421553	0.0194473	0.407223	0.848223	13536
Burundi	27196	27196	0	0.306222	0.420356	0.306222	0.728481		0.325489	0.284012	0.0170613	0.0414767	0.34255	8328
Haiti	145048	27016	118032	0.279521	0.784276	0.653983	0.833868	0.193812	0.220758	0.167012	0.471276	0.0537459	0.692034	17668
Equatorial Guinea	333112	26864	306248	0.0819904	0.891453	0.718434	0.805913	0.0261618	0.890411	0.711435	0.000446694	0.178976	0.890858	19300
Rwanda	25512	25512	0	0.221856	0.304641	0.221856	0.728255		0.234399	0.196927	0.0233616	0.0374726	0.257761	5660
Macedonia	25380	25380	0	0.469346	0.595902	0.469346	0.787622		0.579511	0.466351	0.00189125	0.11316	0.581403	11912
Belize	56948	22472	34476	0.551591	0.862941	0.601994	0.697607	0.518738	0.796903	0.542008	0.0459238	0.254361	0.842293	13528
Djibouti	29252	21988	7264	0.239847	0.119884	0.0636711	0.531108	0.773128	0.0265599	0.0169183	0.0362016	0.00964162	0.0627615	1400
Israel	46672	21960	24712	0.16661	0.0883424	0.0604736	0.684536	0.260926	0.0336976	0.0284153	0.0147541	0.00528233	0.0484517	1328
El Salvador	116360	20664	95696	0.275971	0.739063	0.618273	0.836564	0.202057	0.159892	0.1235	0.487805	0.0363918	0.647696	12776
Slovenia	20516	20316	200	0.575746	0.708604	0.572554	0.808002	0.9	0.70821	0.570782	0	0.137429	0.70821	11632
New Caledonia	18956	18956	0	0.382781	0.75881	0.382781	0.504449		0.133783	0.0468453	0.326651	0.0863051	0.459802	7256
Fiji	1300116	18944	1281172	0.112796	0.641681	0.608108	0.94768	0.105472	0.162584	0.134713	0.357897	0.0278716	0.520481	11520
Kuwait	28772	17536	11236	0.289448	0.0123175	0.0123175	1	0.721609	0.000456204	0	0.00159672	0.000228102	0.00182482	216
eSwatini	17196	17196	0	0.528262	0.615725	0.528262	0.857952		0.457781	0.398	0.130263	0.0597813	0.588044	9084
East Timor	93164	15184	77980	0.209351	0.157007	0.1196	0.761745	0.226827	0.127239	0.0824552	0.0229189	0.044784	0.150158	1816
Montenegro	20144	13764	6380	0.615369	0.814008	0.644871	0.792217	0.551724	0.80587	0.63528	0.00174368	0.17059	0.807614	8876
The Bahamas	635316	12652	622664	0.402804	0.855201	0.531774	0.621811	0.400184	0.516914	0.276004	0.159659	0.196965	0.632627	6728
Vanuatu	639236	12332	626904	0.190609	0.862147	0.48362	0.560948	0.184845	0.654233	0.308141	0.110607	0.342848	0.761596	5964
Falkland Islands	11488	11488	0	0.0633705	0	0	0		0	0	0	0	0	0
Qatar	42848	11220	31628	0.32739	0.0181818	0.0181818	1	0.43531	0	0	0.00320856	0	0.00320856	204
Jamaica	284904	11056	273848	0.160573	0.782562	0.63712	0.814147	0.141334	0.431983	0.327786	0.289436	0.104197	0.721418	7044
Kosovo	10928	10928	0	0.359078	0.487921	0.359078	0.735934		0.487555	0.358712	0.000366032	0.128843	0.487921	3924
Gambia	33912	10672	23240	0.282142	0.325712	0.26949	0.827388	0.287952	0.114693	0.0802099	0.172414	0.0344828	0.287106	2876
Lebanon	30268	10044	20224	0.273688	0.323775	0.286738	0.885609	0.267207	0.0438072	0.0382318	0.168061	0.00557547	0.211868	2880
Puerto Rico	9052	9052	0	0.699072	0.72205	0.699072	0.968176		0.419355	0.369863	0.288113	0.0477243	0.7057	6328
French Southern and Antarctic Lands	7284	7284	0	0.0115321	0	0	0		0	0	0	0	0	0
Palestine	6292	6292	0	0.221233	0.282263	0.221233	0.783784		0.13986	0.111888	0.0464081	0.027972	0.186268	1392
Brunei	49132	5752	43380	0.308068	0.86509	0.66968	0.774116	0.26012	0.853268	0.650209	0.00347705	0.20306	0.856745	3852
Cyprus	104100	5420	98680	0.232085	0.487823	0.453875	0.930408	0.219903	0.0664207	0.0560886	0.328413	0.0103321	0.394834	2460
Trinidad and Tobago	82164	5144	77020	0.348182	0.732504	0.580093	0.791932	0.332693	0.694401	0.508554	0.0342146	0.185848	0.728616	2984
South Georgia and the Islands	3908	3908	0	0.00204708	0	0	0		0	0	0	0	0	0
Cabo Verde	810336	3888	806448	0.628016	0	0	0	0.630548	0	0	0	0	0	0
French Polynesia	3428	3428	0	0.192532	0	0	0		0	0	0	0	0	0
Northern Cyprus	3340	3340	0	0.311377	0.37485	0.311377	0.830671		0.011976	0.00838323	0.134132	0.00359281	0.146108	1040
Samoa	134052	2776	131276	0.123803	0	0	0	0.124471	0	0	0	0	0	0
Luxembourg	2620	2620	0	0.499237	0.570992	0.499237	0.874332		0.570992	0.499237	0	0.0717557	0.570992	1308
Siachen Glacier	2064	2064	0	0	0.100775	0	0		0.00968992	0	0	0.00968992	0.00968992	0
Mauritius	1942436	2012	1940424	0.139172	0	0	0	0.139122	0	0	0	0	0	0
Comoros	167140	1640	165500	0.102668	0	0	0	0.101559	0	0	0	0	0	0
Faroe Islands	1328	1328	0	0.358434	0.740964	0.358434	0.48374		0	0	0.0331325	0	0.0331325	476
Hong Kong S.A.R.	1048	1048	0	0.515267	0.515267	0.515267	1		0.0496183	0.0267176	0.354962	0.0229008	0.40458	540
SÃƒÂ£o TomÃƒÂ© and Principe	167496	1032	166464	0.280007	0	0	0	0.280854	0	0	0	0	0	0
Kiribati	3462532	988	3461544	0.3893	0	0	0	0.389258	0	0	0	0	0	0
Aland	920	920	0	0.447826	0.73913	0.447826	0.605882		0.0869565	0.0565217	0.313043	0.0304348	0.4	412
Dominica	29480	744	28736	0.291045	0.946237	0.876344	0.926136	0.275891	0.919355	0.817204	0.0268817	0.102151	0.946237	652
Federated States of Micronesia	3030868	624	3030244	0.723893	0	0	0	0.723981	0	0	0	0	0	0
Saint Lucia	16124	624	15500	0.461176	0.846154	0.692308	0.818182	0.451871	0.820513	0.602564	0.025641	0.217949	0.846154	432
Bahrain	8140	596	7544	0.760688	0.0536913	0.0536913	1	0.803818	0.00671141	0.00671141	0.00671141	0	0.0134228	32
Tonga	670056	592	669464	0.0823513	0	0	0	0.0820836	0	0	0	0	0	0
Isle of Man	580	580	0	0.462069	0.793103	0.462069	0.582609		0.77931	0.427586	0.0137931	0.351724	0.793103	268
Northern Mariana Islands	580	580	0	0.213793	0	0	0		0	0	0	0	0	0
Guam	560	560	0	0.307143	0	0	0		0	0	0	0	0	0
Singapore	1216	520	696	0.592105	0.130769	0.130769	1	0.902299	0.0923077	0.0846154	0.0384615	0.00769231	0.130769	68
Palau	619300	500	618800	0.631855	0	0	0	0.632114	0	0	0	0	0	0
Antigua and Barbuda	112620	464	112156	0.133582	0.784483	0.784483	1	0.130889	0.181034	0.103448	0.551724	0.0775862	0.732759	364
CuraÃƒÂ§ao	456	456	0	0.508772	0.780702	0.508772	0.651685		0.0526316	0.0350877	0.368421	0.0175439	0.421053	232
Andorra	448	448	0	0.821429	0.9375	0.821429	0.87619		0.9375	0.821429	0	0.116071	0.9375	368
Seychelles	1350692	436	1350256	0.196468	0	0	0	0.196324	0	0	0	0	0	0
Turks and Caicos Islands	432	432	0	0.638889	0.759259	0.638889	0.841463		0.435185	0.296296	0.25	0.12037	0.666667	276
Barbados	186556	428	186128	0.0751731	0.130841	0.130841	1	0.0746153	0.0841121	0.0747664	0.046729	0.00934579	0.130841	56
Heard Island and McDonald Islands	392	392	0	0.112245	0	0	0		0	0	0	0	0	0
Saint Helena	368	368	0	0	0	0	0		0	0	0	0	0	0
United States Virgin Islands	360	360	0	0.766667	0.588889	0.588889	1		0.322222	0.277778	0.233333	0.0444444	0.555556	212
Grenada	26068	348	25720	0.437318	0.908046	0.781609	0.860759	0.432659	0.896552	0.689655	0.0114943	0.206897	0.908046	272
Saint Vincent and the Grenadines	36832	348	36484	0.386946	0.816092	0.597701	0.732394	0.384936	0.804598	0.505747	0.0114943	0.298851	0.816092	208
Cyprus No Mans Area	324	324	0	0.320988	0.37037	0.320988	0.866667		0	0	0.148148	0	0.148148	104
Malta	53360	324	53036	0.521589	0.0246914	0.0246914	1	0.523946	0.0246914	0.0246914	0	0	0.0246914	8
Cayman Islands	312	312	0	0.871795	0.705128	0.705128	1		0.564103	0.512821	0.141026	0.0512821	0.705128	220
Saint Kitts and Nevis	9844	272	9572	0.445347	0.691176	0.691176	1	0.433347	0.264706	0.25	0.367647	0.0147059	0.632353	188
Saint Pierre and Miquelon	224	224	0	0.178571	0.857143	0.178571	0.208333		0.214286	0	0.107143	0.196429	0.303571	40
Niue	216	216	0	0.166667	0	0	0		0	0	0	0	0	0
Cook Islands	188	188	0	0.234043	0	0	0		0	0	0	0	0	0
Aruba	172	172	0	0.604651	0.744186	0.604651	0.8125		0	0	0.465116	0	0.465116	104
American Samoa	164	164	0	0.243902	0	0	0		0	0	0	0	0	0
British Virgin Islands	152	152	0	0.868421	0.736842	0.736842	1		0.526316	0.473684	0.157895	0.0526316	0.684211	112
Liechtenstein	148	148	0	0.567568	0.648649	0.567568	0.875		0.648649	0.567568	0	0.0810811	0.648649	84
Marshall Islands	2014328	140	2014188	0.711026	0	0	0	0.71101	0	0	0	0	0	0
Wallis and Futuna	136	136	0	0.558824	0	0	0		0	0	0	0	0	0
Jersey	128	128	0	0.21875	0.125	0.125	1		0.03125	0	0.03125	0.03125	0.0625	16
Dhekelia Sovereign Base Area	120	120	0	0.166667	0.0666667	0.0666667	1		0	0	0	0	0	8
Indian Ocean Territories	104	104	0	0.423077	0	0	0		0	0	0	0	0	0
Akrotiri Sovereign Base Area	104	104	0	0.230769	0.192308	0.192308	1		0.115385	0.0769231	0.0384615	0.0384615	0.153846	20
Montserrat	100	100	0	0.6	0.84	0.6	0.714286		0.6	0.28	0.24	0.32	0.84	60
Maldives	926852	96	926756	0.112747	0	0	0	0.112673	0	0	0	0	0	0
Anguilla	76	76	0	0.736842	0.789474	0.736842	0.933333		0	0	0.578947	0	0.578947	56
Guernsey	72	72	0	0.444444	0.0555556	0.0555556	1		0	0	0	0	0	4
Saint Martin	72	72	0	0.944444	0.666667	0.666667	1		0.166667	0.166667	0.444444	0	0.611111	48
Bermuda	68	68	0	0.705882	0	0	0		0	0	0	0	0	0
San Marino	64	64	0	0	0	0	0		0	0	0	0	0	0
US Naval Base Guantanamo Bay	64	64	0	0.375	0.9375	0.375	0.4		0.875	0.25	0.0625	0.625	0.9375	24
Pitcairn Islands	44	44	0	0	0	0	0		0	0	0	0	0	0
Macao S.A.R	40	40	0	0.5	0.3	0.3	1		0.2	0.2	0	0	0.2	12
British Indian Ocean Territory	36	36	0	0.444444	0	0	0		0	0	0	0	0	0
Norfolk Island	32	32	0	0.125	0.125	0.125	1		0	0	0	0	0	4
Nauru	311364	32	311332	0.714148	0	0	0	0.714144	0	0	0	0	0	0
United States Minor Outlying Islands	32	32	0	0	0.25	0	0		0	0	0	0	0	0
Saint Barthelemy	28	28	0	1	0.428571	0.428571	1		0	0	0.428571	0	0.428571	12
Sint Maarten	24	24	0	0.833333	0.666667	0.666667	1		0.166667	0.166667	0.5	0	0.666667	16
Tuvalu	726192	20	726172	0.661324	0	0	0	0.661325	0	0	0	0	0	0
Monaco	300	16	284	0.333333	0	0	0	0.323944	0	0	0	0	0	0
Spratly Islands	12	12	0	1	0	0	0		0	0	0	0	0	0
Scarborough Reef	8	8	0	1	0	0	0		0	0	0	0	0	0
Serranilla Bank	8	8	0	1	0	0	0		0	0	0	0	0	0
Bajo Nuevo Bank (Petrel Is.)	4	4	0	1	0	0	0		0	0	0	0	0	0
Clipperton Island	4	4	0	0	0	0	0		0	0	0	0	0	0
Coral Sea Islands	4	4	0	0	0	0	0		0	0	0	0	0	0
Gibraltar	388	4	384	1	0	0	0	1	0	0	0	0	0	0
Vatican	4	4	0	0	0	0	0		0	0	0	0	0	0

## Sheet: SI Table 1
Country (ranked by land area)	Total area (sq km)	Area of land (sq km)	Area of EEZ (sq km)	% of total area that is local critical natural assets (LCNA)	% of land that is natural assets	% of land that is LCNA	% of natural assets that are LCNA	% eez that is LCNA	% of land critical for global climate (GCNA)	% overlap between LCNA and GCNA	% of LCNA not over- lapping with GCNA	% of GCNA not over- lapping with LCNA	Total % of land that contains LCNA and GCNA	LCNA % area selected across all 12 "drop 1" optimizations	LCNA % area selected across 11 of 12 "drop 1" optimizations
Global	274470564	134761492	139709072	0.272642	0.639456	0.304175	0.475678	0.242226	0.385268	0.237455	0.0626337	0.143451	0.44354	0.61924	0.969076
Russia	24615504	16924348	7691156	0.18526	0.861994	0.17825	0.206788	0.200684	0.35774	0.149434	0.0265192	0.20407	0.380022	0.573498	0.962449
Canada	15661972	9917508	5744464	0.129595	0.879692	0.106901	0.121521	0.168776	0.277687	0.0884178	0.0167106	0.157257	0.262386	0.594832	0.983324
United States of America	21628792	9467504	12161288	0.24688	0.757518	0.373709	0.493334	0.148145	0.528844	0.341412	0.0299445	0.180815	0.552172	0.565203	0.964451
China	10701884	9393892	1307992	0.292522	0.512536	0.253647	0.494887	0.571719	0.381235	0.200248	0.0507428	0.179958	0.430949	0.549182	0.969165
Brazil	12222380	8523920	3698460	0.387683	0.746638	0.459635	0.615607	0.221852	0.705004	0.424842	0.0335433	0.280017	0.738402	0.623511	0.961374
Australia	16745092	7723376	9021716	0.234683	0.871111	0.243787	0.279857	0.22689	0.104757	0.0561547	0.185728	0.0420857	0.283968	0.254488	0.981141
India	5503556	3165956	2337600	0.189262	0.285529	0.193742	0.678539	0.183195	0.199136	0.15349	0.0350302	0.0455913	0.234112	0.717174	0.949115
Argentina	3863420	2790952	1072468	0.500429	0.713805	0.441581	0.61863	0.653573	0.230473	0.187707	0.251544	0.0425145	0.481765	0.48334	0.970501
Kazakhstan	2826860	2712492	114368	0.337713	0.642577	0.351843	0.547551	0.00258814	0.552878	0.308855	0.0375212	0.241952	0.588328	0.403893	0.94797
Democratic Republic of the Congo	2354184	2340724	13460	0.703136	0.882438	0.705734	0.799754	0.251412	0.868044	0.701574	0.00399876	0.16647	0.872043	0.80481	0.982704
Algeria	2448776	2317420	131356	0.0414133	0.0514503	0.028209	0.548276	0.274369	0.0304925	0.0180269	0.00899103	0.0124639	0.0394818	0.698342	0.954354
Greenland	2142460	2142460	0	0.00552076	0.166295	0	0		0				0
Mexico	5168872	1966228	3202644	0.289645	0.811123	0.491489	0.605937	0.165724	0.329893	0.242525	0.245384	0.0873327	0.575242	0.558774	0.969441
Saudi Arabia	2155684	1930412	225272	0.0754619	0.0403064	0.021728	0.539071	0.535921	0.00012847	9.32443e-05	0.00424987	2.90094e-05	0.00437212	0.513828	0.968529
Indonesia	7952676	1892408	6060268	0.370513	0.630904	0.32962	0.522457	0.383282	0.580048	0.278511	0.0330119	0.301472	0.612995	0.607186	0.963153
Sudan	1950240	1867248	82992	0.201951	0.267435	0.185554	0.693829	0.57085	0.145288	0.119772	0.0648419	0.02534	0.209954	0.750563	0.965781
Libya	1995616	1630216	365400	0.0452492	0.0260039	0.00847986	0.326099	0.209294	0.000306708	0.000252727	0.00171511	5.39806e-05	0.00202182	0.510417	0.98206
Iran	1843292	1627164	216128	0.126311	0.147874	0.0881018	0.595787	0.413977	0.11056	0.0729736	0.0123429	0.0369207	0.122237	0.596222	0.970842
Mongolia	1563920	1563920	0	0.29724	0.493928	0.29724	0.601789		0.292583	0.200749	0.0960203	0.0917771	0.388547	0.615308	0.972181
Peru	2158176	1298040	860136	0.392148	0.88449	0.571582	0.646227	0.121362	0.753487	0.488044	0.0806262	0.265443	0.834113	0.612139	0.96962
Chad	1273508	1273508	0	0.214736	0.311963	0.214736	0.688337		0.145127	0.121629	0.0927108	0.0234942	0.237834	0.632206	0.99627
Mali	1259524	1259524	0	0.185473	0.234053	0.185473	0.79244		0.0412632	0.0385225	0.145169	0.00274072	0.186432	0.733502	0.981867
Angola	1750540	1251856	498684	0.517116	0.916511	0.658763	0.718772	0.161537	0.893649	0.648081	0.00966565	0.245568	0.903315	0.717979	0.992259
South Africa	2774500	1224140	1550360	0.314882	0.848341	0.592877	0.698866	0.0953817	0.126832	0.09395	0.498276	0.0328819	0.625108	0.595703	0.993248
Niger	1187828	1187828	0	0.18173	0.242894	0.18173	0.748187		0.00127965	0.00126281	0.174318	1.68375e-05	0.175598	0.707279	0.99105
Colombia	1866912	1142680	724232	0.335907	0.873175	0.47885	0.5484	0.110373	0.855354	0.464112	0.0126895	0.391242	0.868044	0.679326	0.961891
Ethiopia	1134556	1134556	0	0.472756	0.694252	0.472756	0.680957		0.615289	0.43114	0.0410205	0.18415	0.65631	0.619485	0.976695
Bolivia	1092884	1092884	0	0.605407	0.845634	0.605407	0.715921		0.828289	0.604229	0.000995531	0.22406	0.829285	0.70428	0.95834
Mauritania	1216088	1041976	174112	0.132185	0.166461	0.116851	0.701974	0.223948	0.000249526	0.000207298	0.112279	4.22275e-05	0.112529	0.717073	0.973652
Egypt	1250212	1006044	244168	0.025938	0.031927	0.00710506	0.22254	0.103535	0.000870737	0.000644107	0.00230209	0.000210726	0.00315692	0.397314	0.976497
United Republic of Tanzania	1190740	947488	243252	0.396903	0.713782	0.45758	0.641065	0.160558	0.632042	0.432888	0.021328	0.199074	0.65329	0.673552	0.965771
Venezuela	1395436	918704	476732	0.50161	0.839287	0.60264	0.718039	0.306915	0.798124	0.570882	0.0295329	0.227172	0.827588	0.772809	0.967012
Nigeria	1093508	913232	180276	0.270246	0.352489	0.270284	0.766788	0.270053	0.312508	0.253802	0.015317	0.0587058	0.327825	0.775977	0.953863
Pakistan	1101288	875924	225364	0.210179	0.381622	0.207255	0.543091	0.221544	0.162589	0.127084	0.0767053	0.0354369	0.239226	0.631266	0.954589
Namibia	1391648	826760	564888	0.462068	0.780822	0.564527	0.722991	0.312111	0.339596	0.252886	0.310688	0.0866999	0.650273	0.506325	0.987573
Mozambique	1361736	792764	568972	0.430791	0.84631	0.618353	0.730646	0.169456	0.729307	0.531321	0.0849433	0.197981	0.814245	0.719874	0.961461
Turkey	1043536	781076	262460	0.340377	0.411893	0.306541	0.744225	0.441073	0.363924	0.270176	0.0316538	0.0937374	0.395567	0.671873	0.932457
Zambia	756488	756488	0	0.683411	0.830284	0.683411	0.823105		0.81734	0.682084	0.001195	0.135257	0.818535	0.808701	0.973361
Chile	4414404	737852	3676552	0.0952727	0.689125	0.247676	0.359406	0.0646867	0.367055	0.125283	0.112234	0.172539	0.410055	0.521833	0.961652
Myanmar	1166872	666444	500428	0.466694	0.656343	0.486228	0.740814	0.440679	0.642899	0.474152	0.00555185	0.168746	0.648451	0.715261	0.965894
Afghanistan	643804	643804	0	0.276631	0.483967	0.276631	0.57159		0.458282	0.272692	0.00344825	0.185529	0.461668	0.640733	0.956024
France	10744036	637004	10107032	0.0579008	0.521874	0.336456	0.644708	0.0403446	0.461259	0.284356	0.0397988	0.176853	0.501008	0.656035	0.957672
South Sudan	630920	630920	0	0.790572	0.946187	0.790572	0.835536		0.946053	0.790471	8.87593e-05	0.155582	0.946142	0.883614	0.989094
Central African Republic	622068	622068	0	0.808156	0.979044	0.808156	0.825454		0.979025	0.80815	0	0.170875	0.979025	0.81606	0.984771
Madagascar	1842036	596124	1245912	0.32395	0.849494	0.650408	0.765642	0.167752	0.644477	0.484812	0.15941	0.159665	0.803886	0.69763	0.956474
Morocco	874924	593764	281160	0.219928	0.224844	0.160198	0.712488	0.346066	0.0717255	0.066262	0.0826119	0.00546345	0.154337	0.691884	0.976619
Kenya	754488	589712	164776	0.398066	0.719137	0.481638	0.669745	0.0989707	0.658118	0.461961	0.0182258	0.196062	0.676249	0.554495	0.983818
Botswana	581924	581924	0	0.541775	0.923818	0.541775	0.586452		0.566534	0.294753	0.246974	0.271781	0.813508	0.479002	0.987122
Ukraine	707652	571372	136280	0.232838	0.200157	0.16299	0.814312	0.525682	0.180282	0.152251	0.0060416	0.0279538	0.186246	0.747487	0.949274
Thailand	818032	517484	300548	0.369179	0.314398	0.224509	0.714093	0.618271	0.295174	0.209436	0.00949981	0.0857379	0.304674	0.708143	0.963884
Spain	1517452	507476	1009976	0.275346	0.437033	0.355225	0.812809	0.23521	0.320606	0.251488	0.078183	0.0691185	0.398789	0.644019	0.938824
Somalia	1262120	474972	787148	0.294026	0.830078	0.610638	0.735639	0.102979	0.583933	0.477965	0.129608	0.10596	0.713533	0.651933	0.986333
Turkmenistan	532768	471460	61308	0.104488	0.209944	0.118008	0.562093	0.000521955	0.133008	0.100225	0.0166546	0.0327833	0.149663	0.48465	0.989072
Papua New Guinea	2887076	468136	2418940	0.67206	0.863809	0.522677	0.605084	0.70097	0.847976	0.497753	0.0106977	0.348412	0.856862	0.724657	0.962221
Cameroon	482652	467344	15308	0.627359	0.841402	0.624662	0.742406	0.709694	0.830532	0.617601	0.00617104	0.212931	0.836703	0.559582	0.958223
Yemen	986256	455628	530628	0.141744	0.161307	0.099274	0.615435	0.178211	0.000254594	0.00019314	0.0724275	5.26746e-05	0.0726733	0.701981	0.961532
Uzbekistan	448200	448200	0	0.112985	0.231388	0.112985	0.488294		0.1361	0.101214	0.0107184	0.0345828	0.146515	0.583333	0.979147
Sweden	600012	444624	155388	0.435665	0.899457	0.330472	0.367413	0.736659	0.786165	0.309349	0.0143042	0.476564	0.800218	0.645043	0.964883
Iraq	439772	438576	1196	0.0175909	0.0297964	0.0153406	0.514845	0.842809	0.0114553	0.00922075	0.0029003	0.00222538	0.0143464	0.629013	0.94887
Paraguay	401704	401704	0	0.625894	0.770528	0.625894	0.812292		0.766096	0.623912	0.00182224	0.142184	0.767919	0.807656	0.998202
Zimbabwe	391384	391384	0	0.495697	0.623449	0.495697	0.795089		0.613127	0.492039	0.00328067	0.121088	0.616407	0.77135	0.938951
Norway	2391520	380476	2011044	0.425137	0.747264	0.257236	0.344237	0.456903	0.373164	0.19689	0.0366699	0.172426	0.405986	0.424228	0.967468
Japan	4669500	374096	4295404	0.173201	0.680574	0.482988	0.709678	0.14622	0.262179	0.165829	0.29524	0.0961785	0.557247	0.650705	0.96573
Germany	413740	357144	56596	0.434891	0.469032	0.383375	0.817374	0.759983	0.463197	0.376957	0.00310239	0.0862397	0.466299	0.778469	0.963804
Republic of the Congo	381200	347180	34020	0.649003	0.898715	0.682816	0.759769	0.303939	0.891941	0.680154	0.00226972	0.211786	0.89421	0.779263	0.989623
Finland	412496	331656	80840	0.484165	0.909038	0.413959	0.455381	0.772192	0.836312	0.388366	0.0192247	0.44744	0.855031	0.508726	0.976954
Vietnam	1086328	330732	755596	0.411758	0.505146	0.388435	0.768956	0.421966	0.426895	0.326294	0.0496716	0.100589	0.476555	0.709624	0.972538
Malaysia	844336	330060	514276	0.602144	0.656741	0.445543	0.678415	0.70265	0.565097	0.363376	0.047555	0.201515	0.612446	0.669133	0.982401
Ivory Coast	495728	322812	172916	0.278733	0.474394	0.373034	0.786339	0.102686	0.468409	0.368735	0.00314734	0.0996741	0.471556	0.757781	0.959542
Poland	342868	312896	29972	0.367885	0.390916	0.32251	0.825011	0.841585	0.383399	0.315312	0.00529249	0.0680865	0.388691	0.738227	0.948668
Oman	872260	312840	559420	0.114269	0.0613221	0.0401227	0.654295	0.155733	0	0	0.00599668	0	0.00599668	0.483748	0.976737
Italy	838760	301348	537412	0.381368	0.396684	0.317042	0.79923	0.417438	0.329745	0.258094	0.0498427	0.0716248	0.379561	0.673519	0.948001
Philippines	2277832	295028	1982804	0.29995	0.357688	0.272286	0.761239	0.304066	0.254172	0.157016	0.0672479	0.0971569	0.32142	0.650998	0.968431
Burkina Faso	274488	274488	0	0.225831	0.276763	0.225831	0.815975		0.0570808	0.04739	0.177815	0.00969077	0.234896	0.835581	0.970188
New Zealand	6105660	268704	5836956	0.0906922	0.899131	0.604978	0.672848	0.0670171	0.628975	0.369998	0.213797	0.220183	0.803978	0.458243	0.983194
Gabon	464852	261768	203084	0.457935	0.947419	0.660722	0.697392	0.196549	0.939106	0.655695	0.00267412	0.282449	0.940818	0.768404	0.985037
Ecuador	1351112	256720	1094392	0.162799	0.817576	0.494469	0.604799	0.084997	0.762901	0.453849	0.0354472	0.309037	0.798333	0.7193	0.985915
Guinea	348736	245884	102852	0.521162	0.76667	0.633616	0.826451	0.252324	0.630297	0.525028	0.107726	0.105269	0.738023	0.774962	0.974633
Uganda	243632	243632	0	0.319236	0.50724	0.319236	0.629358		0.362415	0.305477	0.00656728	0.0569383	0.368983	0.783172	0.968525
United Kingdom	6127288	243144	5884144	0.131705	0.636051	0.479189	0.753382	0.117347	0.516435	0.407314	0.0511795	0.10894	0.567433	0.741452	0.98359
Ghana	469140	240176	228964	0.309954	0.515972	0.430568	0.834479	0.183435	0.438295	0.368996	0.0562088	0.0692992	0.494504	0.775577	0.976173
Romania	265976	236388	29588	0.357656	0.424472	0.351659	0.828463	0.40557	0.40975	0.344214	0.00614244	0.065401	0.415757	0.767876	0.959725
Laos	229312	229312	0	0.68525	0.814087	0.68525	0.84174		0.803865	0.677435	0.00680296	0.12643	0.810668	0.797297	0.964642
Guyana	352220	212656	139564	0.342593	0.981773	0.407042	0.414599	0.24439	0.979065	0.403224	0.00221955	0.575841	0.981284	0.527033	0.947227
Belarus	207080	207080	0	0.383407	0.462816	0.383407	0.828422		0.459108	0.380722	0.00239521	0.0783852	0.461503	0.794297	0.954809
Kyrgyzstan	199084	199084	0	0.429748	0.6245	0.429748	0.688147		0.553013	0.414719	0.012437	0.138233	0.565389	0.6933	0.948244
Senegal	356688	197232	159456	0.388732	0.67413	0.531476	0.788387	0.212171	0.0426908	0.0311309	0.496735	0.0114991	0.539365	0.682286	0.958864
Syria	196616	186328	10288	0.0565163	0.0645743	0.0384269	0.59508	0.384137	0.0279078	0.0188914	0.00824353	0.00901636	0.0361513	0.639106	0.941899
Cambodia	231168	182144	49024	0.452052	0.554902	0.417977	0.753245	0.578655	0.452543	0.340148	0.0741831	0.112395	0.526726	0.826722	0.975937
Uruguay	321248	177824	143424	0.498008	0.797305	0.669606	0.839836	0.285252	0.0653005	0.0561679	0.611189	0.00913263	0.676489	0.747145	0.970404
Somaliland	168536	168536	0	0.513908	0.762211	0.513908	0.674233		0.0739071	0.0615892	0.44489	0.0123178	0.518797	0.747148	0.97991
Tunisia	256980	157060	99920	0.355452	0.118757	0.0805807	0.678533	0.78751	0.0347128	0.0311983	0.0342544	0.00351458	0.0689673	0.553413	0.970607
Nepal	147612	147612	0	0.517275	0.653605	0.517275	0.791418		0.652115	0.516354	0.000867138	0.135761	0.652982	0.78354	0.982765
Suriname	280288	146080	134208	0.361814	0.991703	0.421961	0.425491	0.296346	0.978834	0.415444	0.00580504	0.563226	0.984474	0.801233	0.978975
Tajikistan	142464	142464	0	0.335748	0.536585	0.335748	0.625713		0.363825	0.311377	0.0223214	0.0523922	0.386091	0.687573	0.977505
Bangladesh	250524	137544	112980	0.300283	0.23431	0.177921	0.75934	0.449248	0.159193	0.115541	0.0259117	0.0435352	0.184988	0.60085	0.970252
Greece	615444	131648	483796	0.369275	0.544391	0.446159	0.819557	0.348353	0.416717	0.338813	0.0885695	0.0779047	0.505287	0.657246	0.952397
Nicaragua	344648	129436	215212	0.393097	0.670818	0.434099	0.647118	0.368437	0.385148	0.237183	0.187336	0.147687	0.572206	0.647256	0.962483
Eritrea	202040	123240	78800	0.343338	0.384615	0.230217	0.598565	0.520254	0.117527	0.107335	0.119929	0.0101915	0.237455	0.795714	0.963485
North Korea	237080	122588	114492	0.407019	0.640715	0.488237	0.762019	0.320057	0.257676	0.190459	0.28887	0.0670212	0.54635	0.709483	0.946936
Malawi	120160	120160	0	0.251232	0.47723	0.251232	0.526437		0.173136	0.139647	0.0978029	0.0334887	0.270939	0.801113	0.967669
Benin	152516	116756	35760	0.374623	0.578437	0.455514	0.787491	0.110515	0.496043	0.404707	0.047929	0.0913358	0.543972	0.790689	0.964049
Honduras	324760	112912	211848	0.414497	0.76123	0.514454	0.675819	0.361221	0.523948	0.314617	0.194523	0.209296	0.718436	0.607699	0.95889
Bulgaria	147612	112852	34760	0.317291	0.411867	0.321837	0.781411	0.302532	0.399709	0.314607	0.00591926	0.0851026	0.405629	0.699119	0.938106
Cuba	464372	110404	353968	0.342157	0.504656	0.383609	0.760141	0.329228	0.182204	0.115431	0.252636	0.0651063	0.433173	0.550907	0.954949
Guatemala	220676	109388	111288	0.300187	0.717666	0.492888	0.686793	0.110776	0.557209	0.365671	0.125754	0.191538	0.682963	0.713554	0.964463
Iceland	861860	102000	759860	0.390718	0.683451	0.21698	0.317478	0.414039	0.000117647	3.92157e-05	0.163608	7.84314e-05	0.163725	0.278691	0.965118
South Korea	530172	98696	431476	0.566186	0.511551	0.392681	0.767628	0.605874	0.109792	0.073235	0.303234	0.0363541	0.412823	0.593869	0.964909
Liberia	349380	95896	253484	0.137077	0.459706	0.308417	0.670901	0.072257	0.452532	0.300284	0.0059648	0.152248	0.458497	0.792805	0.972681
Hungary	93076	93076	0	0.228802	0.27629	0.228802	0.828123		0.263827	0.222141	0.00485625	0.0416864	0.268684	0.743426	0.971638
Portugal	1823500	91544	1731956	0.102857	0.435288	0.37228	0.85525	0.0886166	0.247313	0.211046	0.079044	0.0362667	0.326357	0.648122	0.9527
Western Sahara	90700	90700	0	0.000220507	8.82029e-05	8.82029e-05	1		0	0	0	0	0	0.2	1
Jordan	89236	89140	96	0.0154198	0.0238726	0.0145389	0.609023	0.833333	0.00807718	0.00749383	0.000358986	0.000583352	0.00843617	0.608025	0.950617
Azerbaijan	167012	86320	80692	0.132374	0.341103	0.25468	0.746638	0.00153671	0.257136	0.217006	0.0271084	0.0401297	0.284245	0.681405	0.95433
Austria	83992	83992	0	0.591675	0.713735	0.591675	0.828985		0.711734	0.590675	0.000761977	0.121059	0.712496	0.818255	0.952914
Czechia	78736	78736	0	0.38986	0.456513	0.38986	0.853995		0.454379	0.388031	0.00147328	0.0663483	0.455852	0.762054	0.97055
Republic of Serbia	77532	77532	0	0.350771	0.409844	0.350771	0.855866		0.404581	0.345973	0.00433369	0.0586081	0.408915	0.787028	0.955876
Panama	407864	74964	332900	0.203087	0.671842	0.441972	0.657851	0.149294	0.595166	0.375007	0.0589616	0.21589	0.649859	0.690088	0.969335
Sierra Leone	233772	72084	161688	0.151772	0.321181	0.260141	0.809952	0.103459	0.232229	0.180345	0.0771322	0.0518839	0.309361	0.789676	0.949232
United Arab Emirates	129352	71384	57968	0.356423	0.0472375	0.040065	0.848161	0.745998	0.00033621	0.00011207	0.00296985	0.000168105	0.00325003	0.615385	0.981818
Georgia	92524	69564	22960	0.438157	0.607441	0.418377	0.688754	0.498084	0.605831	0.414352	0.000517509	0.191478	0.606348	0.640462	0.955058
Ireland	495468	69244	426224	0.459582	0.900295	0.73849	0.820276	0.41427	0.751487	0.64976	0.065623	0.101727	0.817111	0.811405	0.980053
Sri Lanka	603828	66740	537088	0.129977	0.492119	0.394606	0.801851	0.097094	0.324783	0.253102	0.122925	0.0716812	0.447708	0.621659	0.976458
Lithuania	71656	64796	6860	0.40527	0.415396	0.355763	0.856442	0.872886	0.409717	0.350145	0.00425952	0.0595716	0.413976	0.758806	0.942912
Latvia	92552	64364	28188	0.664275	0.692126	0.579641	0.837479	0.857528	0.664347	0.555279	0.0210055	0.109067	0.685352	0.625818	0.958936
Togo	72892	57348	15544	0.358997	0.497942	0.422683	0.848858	0.124035	0.452187	0.386483	0.0347353	0.0657041	0.486922	0.774917	0.95363
Croatia	110564	55028	55536	0.60754	0.542924	0.432943	0.797429	0.780539	0.48608	0.377626	0.0412881	0.108454	0.527368	0.639355	0.946441
Bosnia and Herzegovina	51832	51820	12	0.571539	0.697646	0.57144	0.819097	1	0.686993	0.56511	0.00586646	0.121883	0.69286	0.739565	0.943942
Costa Rica	637336	51480	585856	0.140121	0.719037	0.555245	0.772207	0.103643	0.526884	0.390521	0.156255	0.136364	0.683139	0.660509	0.952421
Dominican Republic	401300	48768	352532	0.144082	0.646982	0.490075	0.75748	0.0962182	0.33645	0.229413	0.251394	0.107037	0.587844	0.638996	0.955481
Slovakia	48488	48488	0	0.446049	0.523098	0.446049	0.852705		0.520871	0.444729	0.00115492	0.0761426	0.522026	0.811541	0.960052
Estonia	82040	45732	36308	0.686884	0.727456	0.578938	0.79584	0.822849	0.587335	0.473979	0.0895653	0.113356	0.6769	0.660372	0.967971
Denmark	2670696	42528	2628168	0.313274	0.217175	0.206734	0.951927	0.314998	0.0640519	0.0541761	0.0666855	0.00987585	0.130737	0.651956	0.977252
Switzerland	41392	41392	0	0.567743	0.71666	0.567743	0.792206		0.700522	0.563394	0.00106301	0.137128	0.701585	0.788255	0.957277
Bhutan	40488	40488	0	0.709148	0.916025	0.709148	0.774159		0.915728	0.709148	0	0.20658	0.915728	0.749094	0.975481
Netherlands	182376	37300	145076	0.402312	0.464772	0.451046	0.970466	0.389782	0.430777	0.369008	0.0218767	0.0617694	0.452654	0.675939	0.971469
Taiwan	467724	36420	431304	0.218933	0.624272	0.397144	0.636172	0.203884	0.233498	0.0959912	0.289951	0.137507	0.523449	0.651272	0.972898
Moldova	33204	33204	0	0.070353	0.0885435	0.070353	0.794558		0.079629	0.0643296	0.0048187	0.0152994	0.0844477	0.714041	0.946918
Guinea-Bissau	140552	33048	107504	0.290626	0.734447	0.567538	0.772742	0.205499	0.383926	0.255144	0.298838	0.128782	0.682764	0.686714	0.967797
Belgium	34128	30636	3492	0.374473	0.376942	0.323019	0.856945	0.825888	0.357618	0.304348	0.0127954	0.0532707	0.370414	0.812045	0.951496
Lesotho	30232	30232	0	0.635353	0.7371	0.635353	0.861964		0.0412808	0.0398254	0.595528	0.00145541	0.636809	0.842982	0.984798
Armenia	29644	29644	0	0.288625	0.392929	0.288625	0.734547		0.359196	0.286196	0.000809607	0.0729996	0.360005	0.614306	0.956054
Albania	40520	28352	12168	0.492004	0.466986	0.385581	0.82568	0.739974	0.410976	0.336907	0.0423251	0.0740688	0.453301	0.746798	0.94292
Solomon Islands	1643080	27356	1615724	0.482085	0.916947	0.494809	0.539627	0.481869	0.830385	0.421553	0.0194473	0.407223	0.848223	0.636229	0.97104
Burundi	27196	27196	0	0.306222	0.420356	0.306222	0.728481		0.325489	0.284012	0.0170613	0.0414767	0.34255	0.785303	0.970701
Haiti	145048	27016	118032	0.279521	0.784276	0.653983	0.833868	0.193812	0.220758	0.167012	0.471276	0.0537459	0.692034	0.734662	0.970795
Equatorial Guinea	333112	26864	306248	0.0819904	0.891453	0.718434	0.805913	0.0261618	0.890411	0.711435	0.000446694	0.178976	0.890858	0.809948	0.97658
Rwanda	25512	25512	0	0.221856	0.304641	0.221856	0.728255		0.234399	0.196927	0.0233616	0.0374726	0.257761	0.75265	0.941343
Macedonia	25380	25380	0	0.469346	0.595902	0.469346	0.787622		0.579511	0.466351	0.00189125	0.11316	0.581403	0.747817	0.942579
Belize	56948	22472	34476	0.551591	0.862941	0.601994	0.697607	0.518738	0.796903	0.542008	0.0459238	0.254361	0.842293	0.592844	0.962153
Djibouti	29252	21988	7264	0.239847	0.119884	0.0636711	0.531108	0.773128	0.0265599	0.0169183	0.0362016	0.00964162	0.0627615	0.491429	0.914286
Israel	46672	21960	24712	0.16661	0.0883424	0.0604736	0.684536	0.260926	0.0336976	0.0284153	0.0147541	0.00528233	0.0484517	0.659639	0.948795
El Salvador	116360	20664	95696	0.275971	0.739063	0.618273	0.836564	0.202057	0.159892	0.1235	0.487805	0.0363918	0.647696	0.714152	0.928303
Slovenia	20516	20316	200	0.575746	0.708604	0.572554	0.808002	0.9	0.70821	0.570782	0	0.137429	0.70821	0.782669	0.955983
New Caledonia	18956	18956	0	0.382781	0.75881	0.382781	0.504449		0.133783	0.0468453	0.326651	0.0863051	0.459802	0.0407938	0.948732
Fiji	1300116	18944	1281172	0.112796	0.641681	0.608108	0.94768	0.105472	0.162584	0.134713	0.357897	0.0278716	0.520481	0.588194	0.972917
Kuwait	28772	17536	11236	0.289448	0.0123175	0.0123175	1	0.721609	0.000456204	0	0.00159672	0.000228102	0.00182482	0.436364	0.945455
eSwatini	17196	17196	0	0.528262	0.615725	0.528262	0.857952		0.457781	0.398	0.130263	0.0597813	0.588044	0.807133	0.96037
East Timor	93164	15184	77980	0.209351	0.157007	0.1196	0.761745	0.226827	0.127239	0.0824552	0.0229189	0.044784	0.150158	0.662996	0.955947
Montenegro	20144	13764	6380	0.615369	0.814008	0.644871	0.792217	0.551724	0.80587	0.63528	0.00174368	0.17059	0.807614	0.750338	0.931951
The Bahamas	635316	12652	622664	0.402804	0.855201	0.531774	0.621811	0.400184	0.516914	0.276004	0.159659	0.196965	0.632627	0.349584	0.971463
Vanuatu	639236	12332	626904	0.190609	0.862147	0.48362	0.560948	0.184845	0.654233	0.308141	0.110607	0.342848	0.761596	0.482897	0.946345
Falkland Islands	11488	11488	0	0.0633705	0	0	0		0	0	0	0	0	0	1
Qatar	42848	11220	31628	0.32739	0.0181818	0.0181818	1	0.43531	0	0	0.00320856	0	0.00320856	0.292308	0.984615
Jamaica	284904	11056	273848	0.160573	0.782562	0.63712	0.814147	0.141334	0.431983	0.327786	0.289436	0.104197	0.721418	0.66042	0.947757
Kosovo	10928	10928	0	0.359078	0.487921	0.359078	0.735934		0.487555	0.358712	0.000366032	0.128843	0.487921	0.741081	0.920489
Gambia	33912	10672	23240	0.282142	0.325712	0.26949	0.827388	0.287952	0.114693	0.0802099	0.172414	0.0344828	0.287106	0.784423	0.944367
Lebanon	30268	10044	20224	0.273688	0.323775	0.286738	0.885609	0.267207	0.0438072	0.0382318	0.168061	0.00557547	0.211868	0.604167	0.904167
Puerto Rico	9052	9052	0	0.699072	0.72205	0.699072	0.968176		0.419355	0.369863	0.288113	0.0477243	0.7057	0.527813	0.990518
French Southern and Antarctic Lands	7284	7284	0	0.0115321	0	0	0		0	0	0	0	0	0	1
Palestine	6292	6292	0	0.221233	0.282263	0.221233	0.783784		0.13986	0.111888	0.0464081	0.027972	0.186268	0.747126	0.95977
Brunei	49132	5752	43380	0.308068	0.86509	0.66968	0.774116	0.26012	0.853268	0.650209	0.00347705	0.20306	0.856745	0.649013	0.955348
Cyprus	104100	5420	98680	0.232085	0.487823	0.453875	0.930408	0.219903	0.0664207	0.0560886	0.328413	0.0103321	0.394834	0.653659	0.931707
Trinidad and Tobago	82164	5144	77020	0.348182	0.732504	0.580093	0.791932	0.332693	0.694401	0.508554	0.0342146	0.185848	0.728616	0.687668	0.963807
South Georgia and the Islands	3908	3908	0	0.00204708	0	0	0		0	0	0	0	0	0	1
Cabo Verde	810336	3888	806448	0.628016	0	0	0	0.630548	0	0	0	0	0	0.05	1
French Polynesia	3428	3428	0	0.192532	0	0	0		0	0	0	0	0	0.30303	0.890909
Northern Cyprus	3340	3340	0	0.311377	0.37485	0.311377	0.830671		0.011976	0.00838323	0.134132	0.00359281	0.146108	0.569231	0.938462
Samoa	134052	2776	131276	0.123803	0	0	0	0.124471	0	0	0	0	0	0.390625	0.90625
Luxembourg	2620	2620	0	0.499237	0.570992	0.499237	0.874332		0.570992	0.499237	0	0.0717557	0.570992	0.801223	0.95107
Siachen Glacier	2064	2064	0	0	0.100775	0	0		0.00968992	0	0	0.00968992	0.00968992	#N/A	#N/A
Mauritius	1942436	2012	1940424	0.139172	0	0	0	0.139122	0	0	0	0	0	0.382979	0.978723
Comoros	167140	1640	165500	0.102668	0	0	0	0.101559	0	0	0	0	0	0.352273	1
Faroe Islands	1328	1328	0	0.358434	0.740964	0.358434	0.48374		0	0	0.0331325	0	0.0331325	0.0504202	0.97479
Hong Kong S.A.R.	1048	1048	0	0.515267	0.515267	0.515267	1		0.0496183	0.0267176	0.354962	0.0229008	0.40458	0.17037	0.940741
SÃƒÂ£o TomÃƒÂ© and Principe	167496	1032	166464	0.280007	0	0	0	0.280854	0	0	0	0	0	0	1
Kiribati	3462532	988	3461544	0.3893	0	0	0	0.389258	0	0	0	0	0	0.233083	0.992481
Aland	920	920	0	0.447826	0.73913	0.447826	0.605882		0.0869565	0.0565217	0.313043	0.0304348	0.4	0.427184	0.941748
Dominica	29480	744	28736	0.291045	0.946237	0.876344	0.926136	0.275891	0.919355	0.817204	0.0268817	0.102151	0.946237	0.558282	0.865031
Federated States of Micronesia	3030868	624	3030244	0.723893	0	0	0	0.723981	0	0	0	0	0	0.130435	0.956522
Saint Lucia	16124	624	15500	0.461176	0.846154	0.692308	0.818182	0.451871	0.820513	0.602564	0.025641	0.217949	0.846154	0.564815	0.87037
Bahrain	8140	596	7544	0.760688	0.0536913	0.0536913	1	0.803818	0.00671141	0.00671141	0.00671141	0	0.0134228	0.5625	0.8125
Tonga	670056	592	669464	0.0823513	0	0	0	0.0820836	0	0	0	0	0	0.315789	0.964912
Isle of Man	580	580	0	0.462069	0.793103	0.462069	0.582609		0.77931	0.427586	0.0137931	0.351724	0.793103	0.761194	0.910448
Northern Mariana Islands	580	580	0	0.213793	0	0	0		0	0	0	0	0	0.322581	0.967742
Guam	560	560	0	0.307143	0	0	0		0	0	0	0	0	0.27907	1
Singapore	1216	520	696	0.592105	0.130769	0.130769	1	0.902299	0.0923077	0.0846154	0.0384615	0.00769231	0.130769	0.478261	1
Palau	619300	500	618800	0.631855	0	0	0	0.632114	0	0	0	0	0	0.435897	1
Antigua and Barbuda	112620	464	112156	0.133582	0.784483	0.784483	1	0.130889	0.181034	0.103448	0.551724	0.0775862	0.732759	0.692308	0.945055
CuraÃƒÂ§ao	456	456	0	0.508772	0.780702	0.508772	0.651685		0.0526316	0.0350877	0.368421	0.0175439	0.421053	0.137931	0.913793
Andorra	448	448	0	0.821429	0.9375	0.821429	0.87619		0.9375	0.821429	0	0.116071	0.9375	0.717391	0.923913
Seychelles	1350692	436	1350256	0.196468	0	0	0	0.196324	0	0	0	0	0	0.214286	0.971429
Turks and Caicos Islands	432	432	0	0.638889	0.759259	0.638889	0.841463		0.435185	0.296296	0.25	0.12037	0.666667	0.0289855	0.985507
Barbados	186556	428	186128	0.0751731	0.130841	0.130841	1	0.0746153	0.0841121	0.0747664	0.046729	0.00934579	0.130841	0.588235	0.823529
Heard Island and McDonald Islands	392	392	0	0.112245	0	0	0		0	0	0	0	0	0	1
Saint Helena	368	368	0	0	0	0	0		0	0	0	0	0	#N/A	#N/A
United States Virgin Islands	360	360	0	0.766667	0.588889	0.588889	1		0.322222	0.277778	0.233333	0.0444444	0.555556	0.333333	0.985507
Grenada	26068	348	25720	0.437318	0.908046	0.781609	0.860759	0.432659	0.896552	0.689655	0.0114943	0.206897	0.908046	0.529412	0.867647
Saint Vincent and the Grenadines	36832	348	36484	0.386946	0.816092	0.597701	0.732394	0.384936	0.804598	0.505747	0.0114943	0.298851	0.816092	0.442308	0.923077
Cyprus No Mans Area	324	324	0	0.320988	0.37037	0.320988	0.866667		0	0	0.148148	0	0.148148	0.807692	1
Malta	53360	324	53036	0.521589	0.0246914	0.0246914	1	0.523946	0.0246914	0.0246914	0	0	0.0246914	0.0909091	1
Cayman Islands	312	312	0	0.871795	0.705128	0.705128	1		0.564103	0.512821	0.141026	0.0512821	0.705128	0.338235	1
Saint Kitts and Nevis	9844	272	9572	0.445347	0.691176	0.691176	1	0.433347	0.264706	0.25	0.367647	0.0147059	0.632353	0.525424	0.847458
Saint Pierre and Miquelon	224	224	0	0.178571	0.857143	0.178571	0.208333		0.214286	0	0.107143	0.196429	0.303571	0.3	1
Niue	216	216	0	0.166667	0	0	0		0	0	0	0	0	0	0.666667
Cook Islands	188	188	0	0.234043	0	0	0		0	0	0	0	0	0.272727	1
Aruba	172	172	0	0.604651	0.744186	0.604651	0.8125		0	0	0.465116	0	0.465116	0.423077	0.846154
American Samoa	164	164	0	0.243902	0	0	0		0	0	0	0	0	0	0.7
British Virgin Islands	152	152	0	0.868421	0.736842	0.736842	1		0.526316	0.473684	0.157895	0.0526316	0.684211	0.484848	1
Liechtenstein	148	148	0	0.567568	0.648649	0.567568	0.875		0.648649	0.567568	0	0.0810811	0.648649	0.52381	0.904762
Marshall Islands	2014328	140	2014188	0.711026	0	0	0	0.71101	0	0	0	0	0	0.151515	1
Wallis and Futuna	136	136	0	0.558824	0	0	0		0	0	0	0	0	0.157895	1
Jersey	128	128	0	0.21875	0.125	0.125	1		0.03125	0	0.03125	0.03125	0.0625	0	0.857143
Dhekelia Sovereign Base Area	120	120	0	0.166667	0.0666667	0.0666667	1		0	0	0	0	0	0.2	1
Indian Ocean Territories	104	104	0	0.423077	0	0	0		0	0	0	0	0	0	1
Akrotiri Sovereign Base Area	104	104	0	0.230769	0.192308	0.192308	1		0.115385	0.0769231	0.0384615	0.0384615	0.153846	0	0.666667
Montserrat	100	100	0	0.6	0.84	0.6	0.714286		0.6	0.28	0.24	0.32	0.84	0.2	0.866667
Maldives	926852	96	926756	0.112747	0	0	0	0.112673	0	0	0	0	0	0.8	1
Anguilla	76	76	0	0.736842	0.789474	0.736842	0.933333		0	0	0.578947	0	0.578947	0.357143	1
Guernsey	72	72	0	0.444444	0.0555556	0.0555556	1		0	0	0	0	0	0.125	1
Saint Martin	72	72	0	0.944444	0.666667	0.666667	1		0.166667	0.166667	0.444444	0	0.611111	0.294118	1
Bermuda	68	68	0	0.705882	0	0	0		0	0	0	0	0	0.583333	1
San Marino	64	64	0	0	0	0	0		0	0	0	0	0
US Naval Base Guantanamo Bay	64	64	0	0.375	0.9375	0.375	0.4		0.875	0.25	0.0625	0.625	0.9375	0.5	1
Pitcairn Islands	44	44	0	0	0	0	0		0	0	0	0	0
Macao S.A.R	40	40	0	0.5	0.3	0.3	1		0.2	0.2	0	0	0.2	0.2	1
British Indian Ocean Territory	36	36	0	0.444444	0	0	0		0	0	0	0	0	0	1
Norfolk Island	32	32	0	0.125	0.125	0.125	1		0	0	0	0	0	0	1
Nauru	311364	32	311332	0.714148	0	0	0	0.714144	0	0	0	0	0	0.333333	1
United States Minor Outlying Islands	32	32	0	0	0.25	0	0		0	0	0	0	0
Saint Barthelemy	28	28	0	1	0.428571	0.428571	1		0	0	0.428571	0	0.428571	0.857143	1
Sint Maarten	24	24	0	0.833333	0.666667	0.666667	1		0.166667	0.166667	0.5	0	0.666667	0.4	1
Tuvalu	726192	20	726172	0.661324	0	0	0	0.661325	0	0	0	0	0	0	1
Monaco	300	16	284	0.333333	0	0	0	0.323944	0	0	0	0	0	0	1
Spratly Islands	12	12	0	1	0	0	0		0	0	0	0	0	0	1
Scarborough Reef	8	8	0	1	0	0	0		0	0	0	0	0	0	1
Serranilla Bank	8	8	0	1	0	0	0		0	0	0	0	0	0	1
Bajo Nuevo Bank (Petrel Is.)	4	4	0	1	0	0	0		0	0	0	0	0	0	1
Clipperton Island	4	4	0	0	0	0	0		0	0	0	0	0
Coral Sea Islands	4	4	0	0	0	0	0		0	0	0	0	0
Gibraltar	388	4	384	1	0	0	0	1	0	0	0	0	0	1	1
Vatican	4	4	0	0	0	0	0		0	0	0	0	0

## Sheet: SI Table 2
Country (ranked by population)	Total population (Landscan 2017)	Population on land that is local critical natural assets (LCNA)	Population on land critical for global climate (GCNA)	Percent of population living on LCNA	Percent of population living on GCNA	Ratio of % pop to % land for LCNA	Ratio of % pop to % land for GCNA	Population benefitting from LCNA	Population benefitting from GCNA	Percent of population benefitting from LCNA	Percent of population benefitting from GCNA	Ratio of pop benefiting to pop living on LCNA	Ratio of pop benefiting to pop living on GNCA
Global	7341941858	1168934232	771148868	0.159213	0.105033	0.523426	0.272624	6389108220	5369617498	0.87022	0.731362	5.46576	6.96314
China	1370730445	136967856	82980379	0.0999233	0.0605373	0.393946	0.158793	1121101594	890449284	0.817886	0.0999233	8.18514	1.65061
India	1278133079	88485930	50633003	0.0692306	0.0396148	0.357333	0.198933	921797950	655768365	0.721207	0.0692306	10.4175	1.74759
United States of America	323806117	92689394	80664054	0.28625	0.249112	0.765969	0.47105	320403145	311306286	0.989491	0.28625	3.45674	1.14908
Indonesia	254421809	37878004	16280107	0.148879	0.0639886	0.451668	0.110316	244939654	230594870	0.962731	0.148879	6.46654	2.32664
Brazil	204578040	53052869	35002397	0.259328	0.171096	0.564204	0.242687	201914446	199952596	0.98698	0.259328	3.80591	1.51569
Pakistan	204166120	16198897	10576391	0.0793417	0.0518029	0.382821	0.318612	155734897	115600400	0.762785	0.0793417	9.61392	1.53161
Nigeria	188649700	30174379	27748061	0.159949	0.147088	0.591782	0.470669	153898199	126478041	0.815788	0.159949	5.10029	1.08744
Bangladesh	157117529	13698772	5998490	0.0871881	0.0381784	0.490037	0.239825	137103359	111984561	0.872617	0.0871881	10.0084	2.2837
Russia	144144677	28516962	23774810	0.197836	0.164937	1.10988	0.461053	138137303	136757367	0.958324	0.197836	4.84404	1.19946
Japan	125239921	15017870	3528044	0.119913	0.0281703	0.248273	0.107447	123941148	119894505	0.98963	0.119913	8.25291	4.25671
Mexico	123993577	25401136	9870496	0.204858	0.0796049	0.416812	0.241306	122195434	93782223	0.985498	0.204858	4.81063	2.57344
Ethiopia	105206039	32855419	33405019	0.312296	0.31752	0.660586	0.51605	90897374	90311138	0.863994	0.312296	2.76659	0.983547
Egypt	98727615	3812238	145998	0.0386137	0.0014788	5.43468	1.69833	95344349	44418846	0.965731	0.0386137	25.0101	26.1116
Philippines	97898021	15988760	3096444	0.163321	0.0316293	0.599813	0.12444	93484786	82187345	0.95492	0.163321	5.84691	5.16359
Vietnam	95036501	11495970	5867111	0.120964	0.0617353	0.311413	0.144615	92859430	84897422	0.977092	0.120964	8.07756	1.95939
Democratic Republic of the Congo	82863685	29354443	30967493	0.35425	0.373716	0.50196	0.430527	74755318	76216225	0.902148	0.35425	2.54664	0.947912
Iran	81452008	4310973	3224677	0.0529265	0.0395899	0.600743	0.358084	71015774	61520235	0.871873	0.0529265	16.4733	1.33687
Germany	80593192	16166956	16508367	0.2006	0.204836	0.523247	0.442222	80544646	80502951	0.999398	0.2006	4.98205	0.979319
Turkey	80143741	12441988	8512473	0.155246	0.106215	0.506444	0.291861	76682318	75576769	0.95681	0.155246	6.16319	1.46162
Thailand	68142105	4238765	2238970	0.0622048	0.0328574	0.27707	0.111315	66102827	61558169	0.970073	0.0622048	15.5948	1.89318
France	65735954	12515094	9930964	0.190384	0.151074	0.565852	0.327524	65331520	63169365	0.993848	0.190384	5.22022	1.26021
United Kingdom	64098136	15403218	13682601	0.240307	0.213463	0.501486	0.41334	63471562	62736916	0.990225	0.240307	4.12067	1.12575
Italy	61240480	7929664	5085296	0.129484	0.0830381	0.408413	0.251825	60132414	56320521	0.981906	0.129484	7.58322	1.55933
South Africa	54657349	19895337	5092550	0.364001	0.0931723	0.613958	0.734612	53838279	41179075	0.985014	0.364001	2.70608	3.90675
United Republic of Tanzania	53633880	16774742	15310375	0.312764	0.285461	0.683517	0.451649	49533541	46719072	0.923549	0.312764	2.95286	1.09565
Myanmar	53484510	6819231	5226354	0.127499	0.0977172	0.262221	0.151995	42544083	35522508	0.795447	0.127499	6.23884	1.30478
South Korea	50315468	9238749	672164	0.183616	0.013359	0.467598	0.121676	49901414	46863091	0.991771	0.183616	5.40132	13.7448
Spain	48031946	9769735	4413926	0.203401	0.0918956	0.572598	0.286631	46945353	42382637	0.977378	0.203401	4.80518	2.21339
Colombia	47355574	13046700	12495809	0.275505	0.263872	0.575348	0.308494	46594767	45802441	0.983934	0.275505	3.57138	1.04409
Kenya	47102899	12165359	11551089	0.258272	0.245231	0.536236	0.372625	42446651	41731590	0.901147	0.258272	3.48914	1.05318
Argentina	44284392	7302668	3327867	0.164904	0.0751476	0.37344	0.326058	42807246	37050399	0.966644	0.164904	5.86186	2.1944
Ukraine	41708795	3363002	2780221	0.0806305	0.0666579	0.494696	0.369743	38750223	38058925	0.929066	0.0806305	11.5225	1.20962
Algeria	40728545	7037439	2645410	0.172789	0.0649522	6.12532	2.1301	35804305	24464776	0.879096	0.172789	5.08769	2.66025
Iraq	40335504	969294	215113	0.0240308	0.00533309	1.56649	0.465559	31931815	23861691	0.791655	0.0240308	32.9434	4.50598
Uganda	39730276	4586510	4562523	0.115441	0.114837	0.361618	0.316867	33962261	32914413	0.854821	0.115441	7.40482	1.00526
Poland	38548752	5969387	6095178	0.154853	0.158116	0.48015	0.412406	38536972	38539364	0.999694	0.154853	6.45577	0.979362
Sudan	37353956	10342147	5037275	0.276869	0.134853	1.49212	0.928176	32026917	20814860	0.85739	0.276869	3.09674	2.05312
Canada	34476073	7195593	4390118	0.208713	0.127338	1.95239	0.458566	33896058	32737887	0.983176	0.208713	4.71067	1.63904
Afghanistan	34095851	8937048	9619524	0.262115	0.282132	0.947528	0.615629	31892732	32587792	0.935385	0.262115	3.5686	0.929053
Morocco	34044087	6483979	1504189	0.190458	0.0441836	1.18889	0.616009	31796604	22334090	0.933983	0.190458	4.90387	4.31061
Peru	30978783	11105547	6537870	0.358489	0.211043	0.627187	0.280089	30135549	18088017	0.97278	0.358489	2.71356	1.69865
Venezuela	30880169	9131402	5173372	0.295704	0.167531	0.490681	0.209905	30229025	29112431	0.978914	0.295704	3.31045	1.76508
Nepal	30593400	6987071	7053216	0.228385	0.230547	0.441515	0.353537	27279292	27225436	0.891672	0.228385	3.90425	0.990622
Malaysia	30011529	3983654	1755630	0.132737	0.0584985	0.297923	0.103519	29287853	27658771	0.975887	0.132737	7.35201	2.26907
Uzbekistan	29799358	946323	776507	0.0317565	0.0260578	0.281068	0.191461	25466443	22242395	0.854597	0.0317565	26.9109	1.21869
Angola	29183564	14700041	12895337	0.50371	0.44187	0.76463	0.494456	28295356	27161838	0.969565	0.50371	1.92485	1.13995
Saudi Arabia	28124932	1956729	1684	0.0695728	5.98757e-05	3.20199	0.466068	16732351	137639	0.594929	0.0695728	8.55118	1161.95
Yemen	27895190	8108278	25988	0.290669	0.00093163	2.92795	3.65928	20286191	1025233	0.727229	0.290669	2.50191	312.001
Ghana	27287268	2640184	1829416	0.0967552	0.0670428	0.224715	0.152963	20374440	16544090	0.746665	0.0967552	7.71705	1.44318
Mozambique	26560095	12582904	10107029	0.473752	0.380534	0.766152	0.521776	25762102	22104895	0.969955	0.473752	2.04739	1.24497
Cameroon	24953119	7287435	7467623	0.292045	0.299266	0.467525	0.360331	22841594	22567703	0.91538	0.292045	3.13438	0.975871
Madagascar	24819901	13785553	10547279	0.555423	0.424953	0.853961	0.659376	23783289	21089185	0.958235	0.555423	1.72523	1.30702
Ivory Coast	23599114	2953176	2870149	0.125139	0.121621	0.335463	0.259647	14656774	14139262	0.621073	0.125139	4.96305	1.02893
North Korea	23401940	4246197	682155	0.181446	0.0291495	0.371636	0.113125	22773176	14234123	0.973132	0.181446	5.36319	6.22468
Taiwan	23085648	2030945	358142	0.0879744	0.0155136	0.221517	0.06644	23015392	22824713	0.996957	0.0879744	11.3324	5.67078
Australia	22849333	5705191	2576895	0.249687	0.112778	1.0242	1.07656	22417286	21405879	0.981091	0.249687	3.92928	2.21398
Sri Lanka	22137848	7376273	3908519	0.333197	0.176554	0.84438	0.543606	21979776	21675401	0.99286	0.333197	2.97979	1.88723
Romania	21459263	2884618	2899927	0.134423	0.135136	0.382254	0.329802	20730683	20541668	0.966048	0.134423	7.18663	0.994721
Burkina Faso	20160229	2650836	387533	0.131488	0.0192226	0.582241	0.336762	12726056	3793231	0.631246	0.131488	4.80077	6.84028
Niger	19236051	7093159	7744	0.368743	0.000402577	2.02907	0.3146	17585819	127116	0.914211	0.368743	2.47926	915.955
Malawi	19172271	2911717	1752459	0.151871	0.0914059	0.604507	0.527943	18365152	15909947	0.957902	0.151871	6.30733	1.6615
Kazakhstan	18469884	3547563	3334665	0.192073	0.180546	0.545905	0.326557	17190748	17049572	0.930745	0.192073	4.84579	1.06384
Syria	18078901	952754	562306	0.0526998	0.0311029	1.37143	1.11449	15833615	13227577	0.875806	0.0526998	16.6188	1.69437
Mali	17924669	3901798	567724	0.217678	0.0316728	1.17363	0.767579	14235256	6603424	0.794171	0.217678	3.64838	6.8727
Chile	17538346	5804057	1570091	0.330935	0.0895233	1.33616	0.243896	17250202	15478976	0.983571	0.330935	2.97209	3.69664
Netherlands	16952999	4249024	3322790	0.250636	0.196	0.555677	0.454992	16906288	16805413	0.997245	0.250636	3.97886	1.27875
Cambodia	16167046	1383540	753404	0.0855778	0.0466012	0.204743	0.102976	14977765	13546661	0.926438	0.0855778	10.8257	1.83639
Zambia	15901762	6702292	7063437	0.421481	0.444192	0.616732	0.543461	15594987	15664511	0.980708	0.421481	2.32681	0.948871
Ecuador	15625817	5359966	4152070	0.34302	0.265719	0.693714	0.3483	14964415	14613910	0.957672	0.34302	2.79189	1.29091
Guatemala	15469543	8253278	5169708	0.533518	0.334186	1.08243	0.59975	15274990	14792750	0.987423	0.533518	1.85078	1.59647
Senegal	14495435	2364104	125418	0.163093	0.00865224	0.306868	0.202672	6408641	624241	0.442114	0.163093	2.71081	18.8498
Zimbabwe	13748107	4199488	4679260	0.305459	0.340357	0.616222	0.555116	13206804	13254149	0.960627	0.305459	3.14486	0.897468
South Sudan	12974180	8276157	8894975	0.637894	0.685591	0.806877	0.724685	12676631	12943655	0.977066	0.637894	1.5317	0.930431
Guinea	12340694	4929610	3729441	0.39946	0.302207	0.630445	0.479467	12041815	10773549	0.975781	0.39946	2.44275	1.32181
Chad	12175771	3588821	1356201	0.294751	0.111385	1.37262	0.767503	10154030	6022361	0.833954	0.294751	2.82935	2.64623
Rwanda	11963961	1591662	1410268	0.133038	0.117876	0.599658	0.502887	4477667	3514880	0.374263	0.133038	2.8132	1.12862
Belgium	11537984	1593287	1459625	0.138091	0.126506	0.4275	0.353746	11537502	11537381	0.999958	0.138091	7.24132	1.09157
Burundi	11504302	2452579	2399609	0.213188	0.208584	0.696189	0.640831	11163503	10901545	0.970376	0.213188	4.55174	1.02207
Tunisia	11222162	946281	157609	0.0843225	0.0140444	1.04644	0.404589	10372409	3152730	0.924279	0.0843225	10.9612	6.00398
Benin	11107123	1545576	1275130	0.139152	0.114803	0.305483	0.231437	9512825	8837572	0.856462	0.139152	6.15487	1.21209
Bolivia	11032684	3409936	3677689	0.309076	0.333345	0.510525	0.40245	10688546	10946719	0.968807	0.309076	3.13453	0.927195
Cuba	10983207	2278618	325491	0.207464	0.0296353	0.540821	0.16265	10941840	8911485	0.996234	0.207464	4.80196	7.00056
Czechia	10627182	1852064	2031222	0.174276	0.191135	0.447023	0.42065	10627182	10627182	1	0.174276	5.73802	0.911798
Portugal	10535151	2151436	551744	0.204215	0.0523717	0.548552	0.211763	10302456	7996576	0.977913	0.204215	4.78864	3.89934
Dominican Republic	10455716	2478040	564098	0.237003	0.0539512	0.483606	0.160354	10064962	8879523	0.962628	0.237003	4.06166	4.39292
Greece	10399857	1762910	724722	0.169513	0.0696858	0.379938	0.167226	10290822	9575140	0.989516	0.169513	5.83741	2.43253
Haiti	10207934	5364900	1460629	0.525562	0.143088	0.803632	0.648165	10102912	8414268	0.989712	0.525562	1.88315	3.67301
Azerbaijan	9922452	644103	424576	0.0649137	0.0427894	0.254883	0.166408	9163779	8468038	0.92354	0.0649137	14.2272	1.51705
Hungary	9861803	912881	875976	0.0925674	0.0888251	0.404574	0.336679	9825901	9828569	0.996359	0.0925674	10.7636	1.04213
Belarus	9555690	1192055	1175570	0.124748	0.123023	0.325367	0.267961	9541249	9551242	0.998489	0.124748	8.00403	1.01402
Sweden	9512654	4154165	3511365	0.436699	0.369126	1.32144	0.469527	8870504	8881920	0.932495	0.436699	2.13533	1.18306
Jordan	9225528	289148	151580	0.0313422	0.0164305	2.15574	2.03419	8702319	7810837	0.943287	0.0313422	30.0964	1.90756
Honduras	8950218	2608031	952404	0.291393	0.106411	0.566412	0.203095	8849393	8283556	0.988735	0.291393	3.39313	2.73837
Austria	8781279	2669998	2898054	0.304056	0.330026	0.513889	0.463693	8773419	8781213	0.999105	0.304056	3.28593	0.921307
Tajikistan	8509930	727363	749831	0.0854723	0.0881125	0.254573	0.242184	8072251	8037731	0.948568	0.0854723	11.098	0.970036
Switzerland	8301755	2585189	2820431	0.311403	0.339739	0.548493	0.48498	8290655	8301406	0.998663	0.311403	3.20698	0.916594
Somalia	7992709	3828754	2390691	0.479031	0.299109	0.784476	0.512231	7605098	4815115	0.951504	0.479031	1.98631	1.60153
Togo	7982507	1256002	994683	0.157344	0.124608	0.372252	0.275567	6380166	5516143	0.799268	0.157344	5.07974	1.26272
Israel	7629219	508231	99622	0.0666164	0.013058	1.10158	0.387504	7366358	3359366	0.965545	0.0666164	14.4941	5.10159
Republic of Serbia	7163415	644937	694465	0.0900321	0.0969461	0.256669	0.239621	7078879	7021272	0.988199	0.0900321	10.9761	0.928682
Bulgaria	7106711	764233	709872	0.107537	0.0998876	0.334134	0.2499	6786060	6693985	0.954881	0.107537	8.87957	1.07658
Laos	7073997	2084199	2097934	0.294628	0.29657	0.429957	0.36893	6742622	6799999	0.953156	0.294628	3.23511	0.993453
Paraguay	6894793	1814242	2030354	0.263132	0.294476	0.42041	0.384386	6856637	6888175	0.994466	0.263132	3.77934	0.893559
Hong Kong S.A.R.	6849951	2881166	44970	0.420611	0.00656501	0.816297	0.13231	6269084	5733951	0.915201	0.420611	2.17588	64.0686
Libya	6731508	563938	6284	0.0837759	0.00093352	9.8794	3.04368	6146587	337977	0.913107	0.0837759	10.8994	89.7419
Papua New Guinea	6466968	3238004	2841604	0.500699	0.439403	0.957951	0.518178	6111465	6097351	0.945028	0.500699	1.88742	1.1395
Lebanon	6200285	1805177	227518	0.291144	0.0366948	1.01537	0.837641	6147984	5038301	0.991565	0.291144	3.40575	7.93422
El Salvador	6133006	2217125	175518	0.361507	0.0286186	0.584704	0.178987	6118290	5618695	0.997601	0.361507	2.75956	12.6319
Nicaragua	5988125	1796236	584101	0.299966	0.0975432	0.69101	0.253262	5881397	5387183	0.982177	0.299966	3.27429	3.07521
Sierra Leone	5934755	1230334	533348	0.20731	0.0898686	0.796914	0.386982	5315207	4364883	0.895607	0.20731	4.32013	2.30681
Eritrea	5887782	2133453	749195	0.362353	0.127246	1.57396	1.0827	5481449	4534726	0.930987	0.362353	2.56929	2.84766
Kyrgyzstan	5722700	728242	766025	0.127255	0.133857	0.296115	0.242051	5678312	5681381	0.992244	0.127255	7.79729	0.950677
Singapore	5606590	500881	157043	0.0893379	0.0280104	0.504953	0.303446	5493693	5218573	0.979864	0.0893379	10.9681	3.18945
Central African Republic	5603671	3449326	3544657	0.615548	0.63256	0.761669	0.646112	5572435	5601786	0.994426	0.615548	1.61551	0.973106
United Arab Emirates	5501365	457274	23	0.0831201	4.18078e-06	2.07463	0.012435	4779657	172563	0.868813	0.0831201	10.4525	19881.5
Slovakia	5429724	817470	945823	0.150555	0.174194	0.33753	0.334427	5424595	5425368	0.999055	0.150555	6.63583	0.864295
Denmark	5351816	1333497	126759	0.249167	0.0236852	1.20525	0.369782	5277334	4486513	0.986083	0.249167	3.95751	10.5199
Turkmenistan	5331160	272305	158775	0.051078	0.0297824	0.432835	0.223915	4207239	2700081	0.789179	0.051078	15.4505	1.71504
Finland	5308910	2966577	2681338	0.558792	0.505064	1.34987	0.603918	5113781	5189877	0.963245	0.558792	1.7238	1.10638
Palestine	5257405	409933	151082	0.0779725	0.028737	0.352445	0.205469	4770632	1738892	0.907412	0.0779725	11.6376	2.71331
Republic of the Congo	4995844	1633168	1258645	0.326905	0.251938	0.478761	0.282461	4841650	4706341	0.969136	0.326905	2.96458	1.29756
Costa Rica	4918985	1435492	559949	0.291827	0.113834	0.525582	0.216052	4898733	4859068	0.995883	0.291827	3.41258	2.56361
Georgia	4888034	863572	820924	0.176671	0.167946	0.422276	0.277216	4799121	4824696	0.98181	0.176671	5.55729	1.05195
Ireland	4886468	2655786	2178225	0.543498	0.445767	0.735959	0.593179	4858876	4747318	0.994353	0.543498	1.82954	1.21924
Norway	4564747	2113438	1317449	0.462991	0.288614	1.79987	0.773423	4123817	3928572	0.903405	0.462991	1.95124	1.60419
Liberia	4326013	820020	465885	0.189556	0.107694	0.614607	0.237981	3265752	3108127	0.75491	0.189556	3.98253	1.76013
New Zealand	4066381	1942277	644354	0.477643	0.158459	0.789521	0.251932	3911698	3632233	0.961961	0.477643	2.01398	3.0143
Croatia	4022835	757206	547245	0.188227	0.136035	0.434761	0.279861	3882896	3797386	0.965214	0.188227	5.12793	1.38367
Bosnia and Herzegovina	3886733	895166	1007049	0.230313	0.259099	0.40304	0.377149	3875403	3881522	0.997085	0.230313	4.32926	0.8889
Mauritania	3767659	1689921	2317	0.448533	0.000614971	3.83851	2.46456	3347098	58646	0.888376	0.448533	1.98062	729.357
Panama	3656505	965393	474478	0.264021	0.129763	0.59737	0.218028	3619795	3532853	0.98996	0.264021	3.74956	2.03464
Moldova	3415404	106241	99321	0.0311064	0.0290803	0.442148	0.365198	2908086	2900367	0.851462	0.0311064	27.3725	1.06967
Oman	3389456	439409	0	0.12964	0	3.23108	#DIV/0!	2788494	0	0.822697	0.12964	6.34601	#DIV/0!
Uruguay	3354933	694467	70065	0.206999	0.0208842	0.309135	0.319816	3263163	2581882	0.972646	0.206999	4.6988	9.91175
Puerto Rico	3309835	1439071	462468	0.434786	0.139725	0.621948	0.333191	3305405	3299759	0.998662	0.434786	2.2969	3.11172
Somaliland	3204281	1632447	58751	0.509458	0.0183352	0.991341	0.248084	3099928	1142552	0.967433	0.509458	1.89895	27.7859
Mongolia	3073670	1039039	670406	0.338045	0.218113	1.13728	0.745473	2800905	2805765	0.911258	0.338045	2.69567	1.54987
Armenia	3030410	196721	199043	0.0649156	0.0656819	0.224913	0.182858	2998862	2998128	0.98959	0.0649156	15.2442	0.988334
Albania	3029644	341638	270951	0.112765	0.0894333	0.292455	0.217612	2990849	2791399	0.987195	0.112765	8.75444	1.26088
Jamaica	2893649	1026859	290166	0.354866	0.100277	0.556985	0.232132	2841701	2755103	0.982048	0.354866	2.76737	3.53887
Kuwait	2852295	126841	0	0.0444698	0	3.54465	0	2379930	8	0.834391	0.0444698	18.7631	#DIV/0!
Lithuania	2818468	467998	466740	0.166047	0.165601	0.466735	0.404183	2815317	2815297	0.998882	0.166047	6.01566	1.0027
Namibia	2494956	1303297	673342	0.522373	0.269881	0.925329	0.794714	2423723	2036850	0.971449	0.522373	1.85969	1.93556
Qatar	2228738	93322	0	0.0418721	0	1.80694	#DIV/0!	2108786	0	0.946179	0.0418721	22.5969	#DIV/0!
Botswana	2189399	1181943	796135	0.539848	0.363632	0.996443	0.641853	2158948	2098935	0.986092	0.539848	1.82661	1.4846
Macedonia	2108556	232900	242807	0.110455	0.115153	0.235338	0.198707	2088409	2103366	0.990445	0.110455	8.96698	0.959198
Gambia	1997898	205183	27520	0.102699	0.0137745	0.381088	0.120099	1918208	1552235	0.960113	0.102699	9.34877	7.45578
Slovenia	1987022	562328	632161	0.283	0.318145	0.494278	0.449224	1984832	1984417	0.998898	0.283	3.52967	0.889533
Lesotho	1953018	702643	16581	0.359773	0.00848994	0.566257	0.205663	1934752	824693	0.990647	0.359773	2.75353	42.3764
Latvia	1933565	550716	488407	0.284819	0.252594	0.491372	0.380214	1931377	1917314	0.998868	0.284819	3.50703	1.12758
Kosovo	1890703	157436	202081	0.0832685	0.106881	0.231896	0.219219	1883698	1890703	0.996295	0.0832685	11.9648	0.779074
Guinea-Bissau	1746002	661910	194476	0.3791	0.111384	0.667973	0.290117	1661447	1221221	0.951572	0.3791	2.51008	3.40356
Gabon	1738438	837197	412298	0.48158	0.237166	0.728869	0.252544	1672469	1700572	0.962053	0.48158	1.9977	2.03056
eSwatini	1456471	521795	359320	0.35826	0.246706	0.678185	0.538917	1454833	1446994	0.998875	0.35826	2.78813	1.45217
Mauritius	1326444	278406	0	0.209889	0	1.12313	#DIV/0!	1268232	0	0.956114	0.209889	4.55533	#DIV/0!
East Timor	1255920	129202	63789	0.102874	0.0507907	0.860157	0.399175	1075754	933269	0.856547	0.102874	8.32614	2.02546
Estonia	1221733	442504	293109	0.362194	0.239912	0.625617	0.408476	1214456	1199253	0.994044	0.362194	2.74451	1.50969
Trinidad and Tobago	1189509	464267	188626	0.390301	0.158575	0.672825	0.228362	1181365	1163757	0.993153	0.390301	2.54458	2.46131
Bahrain	1038211	295148	524	0.284285	0.000504714	1.3237	0.0752024	1025903	847945	0.988145	0.284285	3.47589	563.26
Bhutan	870394	547289	587242	0.628783	0.674685	0.886673	0.736775	863279	870153	0.991826	0.628783	1.57737	0.931965
Djibouti	821637	339968	4794	0.413769	0.00583469	6.49854	0.21968	691391	22949	0.84148	0.413769	2.03369	70.9153
Fiji	813134	416920	61601	0.512732	0.0757575	0.84316	0.465958	764013	565666	0.939591	0.512732	1.83252	6.76807
Guyana	716848	369757	219607	0.515809	0.306351	1.26721	0.312902	703511	701780	0.981395	0.515809	1.90263	1.68372
Cyprus	700731	96551	2299	0.137786	0.00328086	0.303578	0.0493952	676970	462343	0.966091	0.137786	7.01153	41.997
Equatorial Guinea	680451	440111	248675	0.646793	0.365456	0.900282	0.410435	646274	672947	0.949773	0.646793	1.46843	1.76982
Comoros	678746	417477	0	0.615071	0	2.86567	#DIV/0!	583383	0	0.859501	0.615071	1.3974	#DIV/0!
Montenegro	606998	219118	202229	0.360986	0.333163	0.559781	0.41342	604210	605488	0.995407	0.360986	2.75746	1.08351
Luxembourg	596003	158107	187193	0.265279	0.314081	0.531369	0.550061	591096	595858	0.991767	0.265279	3.73858	0.84462
Suriname	584869	235434	128597	0.402541	0.219873	0.953979	0.224628	578641	582624	0.989351	0.402541	2.45776	1.83079
Macao S.A.R	564113	396532	333915	0.70293	0.591929	1.40586	2.95965	555588	484778	0.984888	0.70293	1.40112	1.18752
Cabo Verde	452747	151128	0	0.333802	0	3.24456	#DIV/0!	328105	0	0.724698	0.333802	2.17104	#DIV/0!
Brunei	419129	125571	76165	0.2996	0.181722	0.447378	0.212972	413190	417104	0.98583	0.2996	3.29049	1.64867
Malta	409763	48602	558	0.11861	0.00136176	0.873401	0.0551514	401267	395230	0.979266	0.11861	8.25618	87.1004
Solomon Islands	400839	287013	205198	0.716031	0.511921	1.44708	0.616487	348275	339105	0.868865	0.716031	1.21345	1.39871
Northern Cyprus	383550	65548	217	0.170898	0.000565767	0.548846	0.0472416	372626	286893	0.971519	0.170898	5.68478	302.065
Belize	338621	154697	107874	0.456844	0.318569	0.758885	0.399758	315679	306368	0.932249	0.456844	2.04063	1.43405
Iceland	306970	238873	2	0.778164	6.51529e-06	3.58633	0.05538	274901	29	0.895531	0.778164	1.15082	119436
The Bahamas	289725	146320	14240	0.505031	0.0491501	0.94971	0.0950836	283726	233410	0.979294	0.505031	1.93908	10.2753
Barbados	247885	86227	4957	0.347851	0.0199972	1.09471	0.237744	241653	228013	0.974859	0.347851	2.80252	17.395
New Caledonia	243095	126420	15399	0.520044	0.0633456	1.35859	0.473493	228874	161268	0.9415	0.520044	1.81043	8.20962
Vanuatu	216480	185630	50705	0.857493	0.234225	1.77307	0.358015	204728	170441	0.945713	0.857493	1.10288	3.66098
French Polynesia	203189	109532	0	0.539065	0	2.79987	#DIV/0!	179927	0	0.885515	0.539065	1.64269	#DIV/0!
SÃƒÂ£o TomÃƒÂ© and Principe	188186	55261	0	0.293651	0	2.04762	#DIV/0!	183842	0	0.976916	0.293651	3.32679	#DIV/0!
Guam	163406	90631	0	0.554637	0	1.80579	#DIV/0!	161052	0	0.985594	0.554637	1.77701	#DIV/0!
Saint Lucia	157880	118161	62153	0.748423	0.393672	1.08106	0.479788	156947	157312	0.99409	0.748423	1.32825	1.90113
Maldives	157785	155935	0	0.988275	0	1.18593	#DIV/0!	0	0	0	0.988275	0	#DIV/0!
CuraÃƒÂ§ao	147442	59581	164	0.404098	0.0011123	0.794261	0.0211337	147429	6455	0.999912	0.404098	2.47443	363.299
Samoa	146519	67695	0	0.462022	0	5.01005	#DIV/0!	131994	0	0.900866	0.462022	1.94983	#DIV/0!
Cyprus No Mans Area	120703	7102	0	0.0588386	0	0.183305	#DIV/0!	120703	114413	1	0.0588386	16.9956	#DIV/0!
United States Virgin Islands	104176	74879	15982	0.718774	0.153413	0.937531	0.476111	102926	96306	0.988001	0.718774	1.37456	4.68521
Grenada	95383	84389	65800	0.884738	0.68985	1.13194	0.769449	94567	92842	0.991445	0.884738	1.12061	1.28251
Seychelles	88552	40430	0	0.456568	0	0.710941	#DIV/0!	76634	0	0.865412	0.456568	1.89547	#DIV/0!
Antigua and Barbuda	85449	74608	1042	0.873129	0.0121944	1.113	0.0673596	85417	84898	0.999626	0.873129	1.14488	71.6008
Isle of Man	85235	21721	33092	0.254837	0.388244	0.551512	0.49819	71053	83612	0.833613	0.254837	3.27117	0.656382
Andorra	84995	68752	70641	0.808895	0.831119	0.984741	0.886527	84995	84995	1	0.808895	1.23625	0.973259
Aruba	80565	52649	0	0.653497	0	1.08078	#DIV/0!	80562	0	0.999963	0.653497	1.53017	#DIV/0!
Saint Vincent and the Grenadines	71274	60619	27840	0.850506	0.390605	1.42296	0.485467	71025	68043	0.996506	0.850506	1.17166	2.17741
Bermuda	63562	48869	0	0.76884	0	1.08919	#DIV/0!	0	0	0	0.76884	0	#DIV/0!
Guernsey	61621	31938	0	0.518297	0	1.16617	#DIV/0!	35840	0	0.58162	0.518297	1.12217	#DIV/0!
Jersey	60305	3497	933	0.0579886	0.0154714	0.265091	0.495083	50871	50221	0.843562	0.0579886	14.547	3.74812
Dominica	59013	54652	33176	0.926101	0.562181	1.05678	0.611495	58490	58571	0.991138	0.926101	1.07023	1.64734
Cayman Islands	57107	56103	10551	0.982419	0.184758	1.12689	0.327526	56979	37326	0.997759	0.982419	1.01561	5.31732
Tonga	51480	21039	0	0.408683	0	1.06114	#DIV/0!	45983	0	0.893221	0.408683	2.18561	#DIV/0!
Northern Mariana Islands	50350	37918	0	0.753088	0	3.52251	#DIV/0!	47492	0	0.943237	0.753088	1.25249	#DIV/0!
American Samoa	45555	16809	0	0.368983	0	1.51283	#DIV/0!	40739	0	0.894282	0.368983	2.42364	#DIV/0!
Turks and Caicos Islands	44265	27501	18297	0.621281	0.413351	0.97244	0.949829	40358	41251	0.911736	0.621281	1.46751	1.50303
Federated States of Micronesia	41989	29832	0	0.710472	0	2.40943	#DIV/0!	38077	0	0.906833	0.710472	1.27638	#DIV/0!
Saint Martin	41301	35163	711	0.851384	0.0172151	0.901465	0.10329	41050	23182	0.993923	0.851384	1.16742	49.4557
Western Sahara	40247	852	0	0.0211693	0	96.0027	#DIV/0!	1727	0	0.04291	0.0211693	2.027	#DIV/0!
Monaco	40195	32366	0	0.805225	0	1.61045	#DIV/0!	40195	0	1	0.805225	1.24189	#DIV/0!
Saint Kitts and Nevis	39936	35673	740	0.893254	0.0185296	1.02951	0.0700009	39855	39855	0.997972	0.893254	1.11723	48.2068
Faroe Islands	37249	24819	0	0.6663	0	1.85892	#DIV/0!	32659	0	0.876775	0.6663	1.31589	#DIV/0!
Liechtenstein	34641	12587	14603	0.363356	0.421552	0.640198	0.649893	34640	34641	0.999971	0.363356	2.75205	0.861946
British Virgin Islands	31118	31108	6413	0.999679	0.206087	1.15115	0.391564	30766	27454	0.988688	0.999679	0.989006	4.85077
San Marino	30139	0	0	0	0	#DIV/0!	#DIV/0!	2020	2020	0.0670228	0	#DIV/0!	#DIV/0!
Kiribati	26147	22089	0	0.844801	0	1.56892	#DIV/0!	15244	0	0.583011	0.844801	0.690117	#DIV/0!
Aland	24202	16354	910	0.675729	0.0376002	1.50891	0.432402	16923	16272	0.69924	0.675729	1.03479	17.9714
Sint Maarten	22221	19133	1779	0.861032	0.0800594	1.03324	0.480356	22221	12257	1	0.861032	1.1614	10.7549
Dhekelia Sovereign Base Area	16445	1244	0	0.0756461	0	0.453877	#DIV/0!	14582	14	0.886713	0.0756461	11.7219	#DIV/0!
Greenland	16269	8845	0	0.543672	0	#DIV/0!	#DIV/0!	10579	0	0.650255	0.543672	1.19604	#DIV/0!
Palau	14500	12462	0	0.859448	0	2.75464	#DIV/0!	13545	0	0.934138	0.859448	1.0869	#DIV/0!
Anguilla	14113	12681	0	0.898533	0	1.21944	#DIV/0!	13168	0	0.93304	0.898533	1.0384	#DIV/0!
Gibraltar	9176	9176	0	1	0	1	#DIV/0!	9176	0	1	1	1	#DIV/0!
Wallis and Futuna	9060	5431	0	0.599448	0	1.0727	#DIV/0!	7123	0	0.786203	0.599448	1.31154	#DIV/0!
Nauru	7641	6939	0	0.908127	0	1.21084	#DIV/0!	7436	0	0.973171	0.908127	1.07162	#DIV/0!
Saint Helena	6998	0	0	0	0	#DIV/0!	#DIV/0!	0	0	0	0	#DIV/0!	#DIV/0!
Saint Barthelemy	6772	6772	0	1	0	1	#DIV/0!	6772	0	1	1	1	#DIV/0!
Cook Islands	5987	4798	0	0.801403	0	3.42418	#DIV/0!	3753	0	0.626858	0.801403	0.782201	#DIV/0!
Saint Pierre and Miquelon	5456	4827	109	0.884714	0.019978	4.9544	0.0932307	5404	127	0.990469	0.884714	1.11954	44.2844
Akrotiri Sovereign Base Area	5389	1359	187	0.25218	0.0347003	1.09278	0.300736	4663	3234	0.865281	0.25218	3.4312	7.26738
Montserrat	4247	3877	835	0.91288	0.196609	1.52147	0.327682	4245	4247	0.999529	0.91288	1.09492	4.64311
Marshall Islands	4024	1755	0	0.436133	0	0.462566	#DIV/0!	3453	0	0.858101	0.436133	1.96752	#DIV/0!
Falkland Islands	2816	33	0	0.0117188	0	0.184924	#DIV/0!	2748	0	0.975852	0.0117188	83.2727	#DIV/0!
Norfolk Island	2180	88	0	0.040367	0	0.322936	#DIV/0!	1780	0	0.816514	0.040367	20.2273	#DIV/0!
Niue	1071	728	0	0.679739	0	4.07843	#DIV/0!	1026	0	0.957983	0.679739	1.40934	#DIV/0!
Vatican	1000	0	0	0	0	#DIV/0!	#DIV/0!	1000	1000	1	0	#DIV/0!	#DIV/0!
Tuvalu	971	564	0	0.580844	0	0.968074	#DIV/0!	917	0	0.944387	0.580844	1.62589	#DIV/0!
Siachen Glacier	239	0	0	0	0	#DIV/0!	0	0	239	0	0	#DIV/0!	#DIV/0!
Indian Ocean Territories	217	217	0	1	0	2.36364	#DIV/0!	217	0	1	1	1	#DIV/0!
US Naval Base Guantanamo Bay	175	28	151	0.16	0.862857	0.426667	0.986122	127	175	0.725714	0.16	4.53571	0.18543
Spratly Islands	69	32	0	0.463768	0	0.463768	#DIV/0!	0	0	0	0.463768	0	#DIV/0!
Pitcairn Islands	15	0	0	0	0			0	0	0	0	#DIV/0!	#DIV/0!
United States Minor Outlying Islands	15	0	0	0	0			0	0	0	0	#DIV/0!	#DIV/0!
French Southern and Antarctic Lands	0	0	0					0	0	0	0	#DIV/0!	#DIV/0!
South Georgia and the Islands	0	0	0					0	0	0	0	#DIV/0!	#DIV/0!
Heard Island and McDonald Islands	0	0	0					0	0	0	0	#DIV/0!	#DIV/0!
British Indian Ocean Territory	0	0	0					0	0	0	0	#DIV/0!	#DIV/0!
Clipperton Island	0	0	0					0	0	0	0	#DIV/0!	#DIV/0!
Scarborough Reef	0	0	0					0	0	0	0	#DIV/0!	#DIV/0!
Serranilla Bank	0	0	0					0	0	0	0	#DIV/0!	#DIV/0!
Coral Sea Islands	0	0	0					0	0	0	0	#DIV/0!	#DIV/0!
Bajo Nuevo Bank (Petrel Is.)	0	0	0					0	0	0	0	#DIV/0!	#DIV/0!

## Sheet: SI Table 3
Country (ranked by number of endemic + majority AOH species)	# Endemic species (whose area of habitat (AOH) is entirely contained within country)	Percent of endemic species within local critical natural assets (LCNA)	Percent of endemic species within global critical natural assets (GCNA)	# Species whose AOH falls >50% within country	Percent of >50% AOH species within LCNA	Percent of >50% AOH species within GCNA				Number of species	Percent of species within LCNA	Percent of species within GCNA
Global	11979	0.33901	0.374906	23129	0.495093	0.532016		Global totals	birds	13077	0.729219	0.733196
Brazil	976	0.61373	0.623975	2360	0.821186	0.83178			mammals	5102	0.662877	0.69659
Indonesia	982	0.305499	0.578411	1729	0.507808	0.707345			reptiles	4031	0.412305	0.406847
Mexico	880	0.404545	0.253409	1433	0.545708	0.418702			amphibians	5967	0.408078	0.459192
Australia	960	0.540625	0.483333	1150	0.566957	0.514783			all vertebrates	28177	0.603861	0.621855
Madagascar	931	0.459721	0.544576	965	0.468394	0.552332		Endemic species (AOH 100% within country)	birds	3435	0.45182	0.497525
United States of America	444	0.547297	0.635135	1208	0.690397	0.762417			mammals	2027	0.407992	0.465713
Colombia	485	0.253608	0.397938	962	0.477131	0.632017			reptiles	2484	0.255233	0.258454
China	362	0.516575	0.48895	1063	0.660395	0.677328			amphibians	4033	0.259856	0.296553
Peru	449	0.351893	0.349666	921	0.565689	0.543974			all vertebrates	11979	0.33901	0.374906
India	470	0.268085	0.259574	877	0.395667	0.375143		Species whose AOH falls >80% within country	birds	5484	0.547046	0.576769
Philippines	596	0.305369	0.515101	619	0.318255	0.521809			mammals	2796	0.501073	0.543991
Papua New Guinea	405	0.207407	0.550617	785	0.471338	0.71465			reptiles	3048	0.304462	0.309383
Argentina	252	0.289683	0.0833333	568	0.56162	0.322183			amphibians	4725	0.30328	0.349841
Venezuela	267	0.235955	0.318352	480	0.43125	0.514583			all vertebrates	16053	0.42123	0.453498
Ecuador	248	0.173387	0.282258	497	0.277666	0.466801		Species whose AOH falls >50% within country	birds	9638	0.612679	0.646711
Democratic Republic of the Congo	92	0.326087	0.413043	426	0.715962	0.769953			mammals	4160	0.565144	0.609615
United Republic of Tanzania	160	0.04375	0.1	285	0.245614	0.34386			reptiles	3748	0.344184	0.35539
Russia	46	0.0869565	0.195652	369	0.623306	0.758808			amphibians	5583	0.341214	0.39477
South Africa	111	0.576577	0.00900901	292	0.767123	0.157534			all vertebrates	23129	0.495093	0.532016
Malaysia	109	0.155963	0.302752	291	0.439863	0.642612
Bolivia	102	0.382353	0.54902	264	0.613636	0.742424
Chile	103	0.31068	0.135922	245	0.359184	0.355102
Japan	132	0.386364	0.295455	180	0.438889	0.361111
Vietnam	89	0.0561798	0.202247	200	0.22	0.465
Sri Lanka	141	0.304965	0.0780142	146	0.30137	0.0753425
Costa Rica	61	0.0491803	0.0491803	207	0.0724638	0.198068
Cuba	111	0.288288	0	143	0.342657	0
Canada	9	0.222222	0.222222	231	0.502165	0.74026
Ethiopia	75	0.213333	0.306667	164	0.542683	0.591463
Cameroon	76	0.144737	0.184211	161	0.409938	0.447205
New Caledonia	108	0	0	120	0	0
Solomon Islands	86	0.151163	0.430233	129	0.124031	0.565891
New Zealand	92	0.184783	0.304348	112	0.205357	0.276786
Panama	63	0.0952381	0.126984	141	0.163121	0.312057
Guatemala	58	0.206897	0.258621	122	0.295082	0.344262
Kenya	49	0.122449	0.183673	125	0.368	0.488
Myanmar	43	0.0930233	0.348837	130	0.453846	0.669231
Honduras	66	0.0151515	0.0606061	97	0.123711	0.123711
Dominican Republic	33	0.030303	0.0606061	119	0.184874	0.0588235
Iran	42	0.0238095	0.0238095	108	0.0555556	0.12037
Taiwan	67	0.402985	0.0447761	76	0.381579	0.0394737
Jamaica	71	0.366197	0	71	0.366197	0
Spain	36	0.0555556	0.0833333	90	0.422222	0.377778
Angola	38	0.5	0.5	84	0.690476	0.690476
Turkey	32	0.03125	0.03125	83	0.26506	0.325301
Yemen	38	0	0	72	0.125	0
France	34	0	0.0588235	72	0.138889	0.25
Fiji	45	0.488889	0	60	0.483333	0
Thailand	29	0	0.137931	72	0.0694444	0.277778
Puerto Rico	40	0.375	0	58	0.327586	0
Haiti	38	0	0	56	0.0357143	0
SÃƒÂ£o TomÃƒÂ© and Principe	44	0	0	45	0	0
Mozambique	12	0	0	67	0.58209	0.626866
Morocco	25	0.12	0.04	50	0.14	0.02
Pakistan	9	0.111111	0.222222	59	0.220339	0.220339
Liberia				68	0.691176	0.955882
Guyana	25	0.04	0.16	40	0.05	0.325
Italy	21	0.238095	0.190476	44	0.295455	0.295455
Namibia	11	0.272727	0	53	0.490566	0.320755
Comoros	28	0	0	35	0	0
Nepal	14	0.214286	0.357143	47	0.361702	0.404255
Kazakhstan	6	0.5	0.333333	54	0.740741	0.759259
Nigeria	14	0	0.0714286	42	0.238095	0.309524
Seychelles	26	0	0	26	0	0
Laos	9	0.333333	0.555556	43	0.465116	0.581395
Federated States of Micronesia	24	0	0	27	0	0
Algeria	7	0.142857	0	43	0.116279	0
Somalia	11	0.454545	0.363636	38	0.631579	0.552632
Zambia	11	0.363636	0	36	0.583333	0
Cambodia	7	0	0	40	0.25	0.475
Nicaragua	6	0	0	41	0.146341	0.439024
Cabo Verde	22	0	0	23	0	0
Vanuatu	19	0	0.526316	26	0	0.538462
Trinidad and Tobago	18	0	0.111111	21	0	0.142857
Saudi Arabia	4	0	0	35	0	0
Palau	17	0	0	20	0	0
The Bahamas	16	0.0625	0	21	0.047619	0
Greece	13	0.0769231	0.153846	24	0.0833333	0.125
French Polynesia	16	0	0	20	0	0
Gabon	8	0.125	0.25	28	0.678571	0.714286
Ivory Coast	8	0	0.125	28	0.0357143	0.178571
Uganda	7	0	0.142857	28	0	0.0357143
Egypt	13	0	0	21	0	0
Ghana	8	0	0	24	0.0833333	0.208333
Mongolia	1	0	0	31	0.387097	0.483871
Oman	9	0	0	20	0	0
Sudan	5	0.2	0	23	0.521739	0.347826
French Southern and Antarctic Lands	4	0	0	23	0	0
Samoa	10	0	0	16	0	0
Malawi	9	0	0	16	0	0
Uruguay	6	0	0	19	0.421053	0
Guinea	8	0	0	16	0.0625	0.0625
Falkland Islands	7	0	0	17	0	0
Zimbabwe	3	0	0	21	0.333333	0
Afghanistan	3	0.333333	0.333333	20	0.45	0.55
Somaliland	6	0.666667	0	14	0.642857	0
Paraguay	3	0.333333	0.333333	17	0.588235	0.764706
Mali	2	0.5	0	16	0.75	0
Cayman Islands	8	0	0	8	0	0
Mauritius	8	0	0	8	0	0
South Korea	5	0	0	11	0.454545	0
Equatorial Guinea	7	0	0	8	0	0
Saint Vincent and the Grenadines	7	0	0	8	0	0
Suriname	5	0.2	0.4	10	0.6	0.7
Senegal	2	0	0	13	0.230769	0
East Timor	1	0	0	14	0	0
Indian Ocean Territories	7	0	0	7	0	0
Northern Mariana Islands	6	0	0	8	0	0
Turkmenistan	2	0.5	0.5	12	0.0833333	0.0833333
Iraq	1	0	0	13	0	0
Portugal	6	0	0	7	0	0
Grenada	5	0	0	7	0	0
Central African Republic	4	0.25	0.25	8	0.625	0.625
Belize	2	0	0.5	10	0	0.2
United Kingdom	2	0.5	0.5	10	0.2	0.3
South Sudan	1	0	0	11	0.727273	0.909091
Republic of the Congo	4	0.25	0.25	7	0.428571	0.571429
Chad	3	0	0	8	0.25	0.25
Dominica	5	0	0	5	0	0
Montserrat	5	0	0	5	0	0
Norfolk Island	5	0	0	5	0	0
Saint Lucia	5	0	0	5	0	0
Sierra Leone	4	0	0	6	0	0
Libya	3	0	0	7	0	0
Mauritania	2	0	0	7	0.285714	0
Norway	2	0	0	7	0.142857	0.142857
Armenia	3	0	0	5	0	0
Hong Kong S.A.R.	3	0	0	5	0	0
United States Virgin Islands	3	0	0	5	0	0
Armenia	3	0	0	5	0	0
Rwanda	2	0	0	6	0	0
Syria	2	0	0	6	0	0
Cyprus	1	0	0	7	0	0
Georgia	1	0	0	7	0	0.142857
Bhutan				8	0.375	0.375
Antigua and Barbuda	3	0	0	4	0	0
Botswana	1	0	0	6	0.833333	0.833333
Israel	1	0	0	6	0	0
Benin	3	0	0	3	0	0
Cook Islands	3	0	0	3	0	0
Singapore	3	0	0	3	0	0
Turks and Caicos Islands	3	0	0	3	0	0
Netherlands	2	0	0	4	0	0
Aruba	2	0	0	3	0	0
Burundi	2	0	0	3	0	0
Eritrea	2	0	0	3	0	0
Tunisia	2	0	0	3	0	0
CuraÃƒÂ§ao	2	0	0	3	0	0
Ukraine	2	0	0	3	0.333333	0.333333
South Georgia and the Islands	1	0	0	4	0	0
Azerbaijan	1	0	0	4	0	0
Bangladesh				5	0	0
Greenland				5	0	0
Lebanon				5	0	0
British Virgin Islands	2	0	0	2	0	0
Saint Helena	2	0	0	2	0	0
Kiribati	1	0	0	3	0	0
Poland	1	0	0	3	0	0
Togo	1	0	0	3	0	0
Saint Kitts and Nevis	1	0	0	3	0	0
United Arab Emirates				4	0	0
El Salvador	1	0	0	2	0	0
Iceland	1	0	0	2	0	0
Kyrgyzstan	1	0	0	2	0	0
Lesotho				3	0	0
North Korea				3	0	0
Tajikistan				3	0.333333	0.333333
Anguilla	1	0	0	1	0	0
Barbados	1	0	0	1	0	0
Denmark	1	0	0	1	0	0
Nauru	1	0	0	1	0	0
Tonga	1	0	0	1	0	0
Saint Barthelemy	1	0	0	1	0	0
Guinea-Bissau	1	0	0	1	0	0
Malta	1	0	0	1	0	0
Niue	1	0	0	1	0	0
Austria	1	0	0	1	0	0
Albania				2	0	0
Ireland				2	0.5	0.5
Uzbekistan				2	0	0
Romania				2	0	0
Finland				1	1	1
Guam				1	0	0
Gambia				1	0	0
Croatia				1	0	0
Jordan				1	0	0
Palestine				1	0	0
Burkina Faso				1	1	0
Bulgaria				1	0	0
Niger				1	0	0

## Sheet: SI Table 4
Country (ranked by # languages)	# Indigenous and Non-Migrant Languages	# languages intersecting local critical natural assets (LCNA)	# languages intersecting lands critical for global climate (CGCNA)	% of languages on LCNA	% of languages on GCNA
Global	6474	6220	5976	0.960766	0.923077
Papua New Guinea	829	822	796	0.991556	0.960193
Indonesia	687	665	655	0.967977	0.953421
Nigeria	493	428	431	0.868154	0.874239
India	408	400	393	0.980392	0.963235
Mexico	277	271	234	0.978339	0.844765
Cameroon	267	256	252	0.958801	0.94382
Democratic Republic of the Congo	202	201	202	0.99505	1
China	193	192	191	0.994819	0.989637
Philippines	171	167	157	0.976608	0.918129
Brazil	159	144	159	0.90566	1
Australia	143	127	130	0.888112	0.909091
Chad	120	117	111	0.975	0.925
Tanzania	115	114	111	0.991304	0.965217
United States	109	100	92	0.917431	0.844037
Malaysia	109	105	105	0.963303	0.963303
Myanmar	109	106	109	0.972477	1
Vanuatu	108	105	93	0.972222	0.861111
Nepal	104	102	102	0.980769	0.980769
Viet Nam	93	91	89	0.978495	0.956989
Russian Federation	91	88	86	0.967033	0.945055
Peru	88	82	87	0.931818	0.988636
Ethiopia	81	80	80	0.987654	0.987654
Canada	75	72	70	0.96	0.933333
Côte d'Ivoire	74	72	70	0.972973	0.945946
Colombia	73	58	72	0.794521	0.986301
Ghana	71	67	65	0.943662	0.915493
Solomon Islands	69	68	57	0.985507	0.826087
Sudan	67	67	65	1	0.970149
Laos	67	66	67	0.985075	1
Burkina Faso	66	61	51	0.924242	0.772727
Mali	63	61	26	0.968254	0.412698
Central African Republic	62	62	62	1	1
Pakistan	58	52	46	0.896552	0.793103
South Sudan	57	57	57	1	1
Kenya	56	47	46	0.839286	0.821429
Congo	55	55	55	1	1
Benin	50	49	46	0.98	0.92
Thailand	48	44	45	0.916667	0.9375
Iran	43	35	30	0.813953	0.697674
Togo	40	36	34	0.9	0.85
Angola	40	40	40	1	1
Gabon	40	38	40	0.95	1
Mozambique	40	40	40	1	1
Bangladesh	36	36	33	1	0.916667
Uganda	36	36	36	1	1
Zambia	35	35	35	1	1
New Caledonia	33	33	30	1	0.909091
Senegal	31	31	25	1	0.806452
Guinea	31	31	30	1	0.967742
Venezuela	31	31	31	1	1
Afghanistan	30	28	28	0.933333	0.933333
Bolivia	30	29	30	0.966667	1
Liberia	27	27	27	1	1
Botswana	26	24	26	0.923077	1
Guatemala	23	23	23	1	1
Italy	21	20	19	0.952381	0.904762
Bhutan	21	21	21	1	1
Namibia	21	21	21	1	1
Ecuador	20	19	20	0.95	1
Niger	19	15	11	0.789474	0.578947
Cambodia	19	17	17	0.894737	0.894737
East Timor	19	18	18	0.947368	0.947368
Guinea-Bissau	18	18	17	1	0.944444
Paraguay	18	18	18	1	1
Sierra Leone	18	18	18	1	1
Micronesia	17	17	0	1	0
Georgia	16	15	15	0.9375	0.9375
Germany	15	15	15	1	1
Zimbabwe	15	15	15	1	1
Algeria	13	7	5	0.538462	0.384615
China-Taiwan	13	12	12	0.923077	0.923077
Argentina	13	13	13	1	1
Azerbaijan	13	13	13	1	1
France	13	13	13	1	1
Spain	13	13	13	1	1
Japan	12	12	8	1	0.666667
Equatorial Guinea	12	11	11	0.916667	0.916667
Turkey	12	11	11	0.916667	0.916667
Malawi	12	12	12	1	1
Netherlands	12	12	12	1	1
South Africa	12	12	12	1	1
Iraq	11	10	8	0.909091	0.727273
Greece	11	10	10	0.909091	0.909091
Madagascar	11	11	11	1	1
Tajikistan	11	11	11	1	1
Belgium	10	10	10	1	1
Guyana	10	9	10	0.9	1
Suriname	10	8	10	0.8	1
Switzerland	10	10	10	1	1
Oman	10	9	0	0.9	0
Eritrea	9	9	9	1	1
Somalia	9	9	9	1	1
Fiji	8	8	4	1	0.5
Morocco	8	7	5	0.875	0.625
Finland	8	8	8	1	1
Sweden	8	8	8	1	1
Libya	7	2	1	0.285714	0.142857
Yemen	7	7	3	1	0.428571
Gambia	7	5	5	0.714286	0.714286
Syria	7	6	5	0.857143	0.714286
Egypt	7	6	6	0.857143	0.857143
Austria	7	7	7	1	1
Brunei	7	7	7	1	1
French Guiana	7	7	7	1	1
Panama	7	6	7	0.857143	1
Ukraine	7	7	7	1	1
French Polynesia	7	5	0	0.714286	0
Israel	5	4	2	0.8	0.4
Chile	5	4	4	0.8	0.8
Mauritania	5	5	4	1	0.8
Portugal	5	5	4	1	0.8
Belize	5	5	5	1	1
Honduras	5	5	5	1	1
Mongolia	5	5	5	1	1
Montenegro	5	5	5	1	1
Nicaragua	5	5	5	1	1
North Macedonia	5	5	5	1	1
Serbia	5	5	5	1	1
Uzbekistan	5	5	5	1	1
Albania	4	4	4	1	1
Armenia	4	4	4	1	1
Costa Rica	4	4	4	1	1
Kazakhstan	4	4	4	1	1
Norway	4	3	4	0.75	1
Sri Lanka	4	4	4	1	1
United Kingdom	4	4	4	1	1
Cook Islands	4	1	0	0.25	0
Croatia	3	3	2	1	0.666667
Jordan	3	3	2	1	0.666667
Andorra	3	3	3	1	1
Bulgaria	3	3	3	1	1
Czechia	3	3	3	1	1
Hungary	3	3	3	1	1
Lesotho	3	3	3	1	1
Lithuania	3	3	3	1	1
Romania	3	3	3	1	1
Saudi Arabia	3	3	3	1	1
Slovakia	3	3	3	1	1
Comoros	3	3	0	1	0
Northern Mariana Islands	3	2	0	0.666667	0
Palau	3	3	0	1	0
São Tomé and Príncipe	3	3	0	1	0
Cyprus	2	2	1	1	0.5
Djibouti	2	2	1	1	0.5
Belarus	2	2	2	1	1
China-Hong Kong	2	2	2	1	1
Denmark	2	2	2	1	1
Estonia	2	2	2	1	1
Grenada	2	2	2	1	1
Ireland	2	2	2	1	1
Jamaica	2	2	2	1	1
Kyrgyzstan	2	2	2	1	1
Latvia	2	2	2	1	1
Liechtenstein	2	2	2	1	1
Luxembourg	2	2	2	1	1
Moldova	2	2	2	1	1
Palestine	2	2	2	1	1
Poland	2	2	2	1	1
South Korea	2	2	2	1	1
Trinidad and Tobago	2	2	2	1	1
Turkmenistan	2	2	2	1	1
Mayotte	2	2	0	1	0
Tonga	2	2	0	1	0
Wallis and Futuna	2	2	0	1	0
Western Sahara	2	2	0	1	0
Aland Islands	1	1	1	1	1
Antigua and Barbuda	1	1	1	1	1
Bahamas	1	1	1	1	1
Barbados	1	1	1	1	1
Bosnia and Herzegovina	1	1	1	1	1
British Virgin Islands	1	1	1	1	1
Burundi	1	1	1	1	1
China-Macao	1	1	1	1	1
Curacao	1	1	1	1	1
Dominica	1	1	1	1	1
El Salvador	1	1	1	1	1
Eswatini	1	1	1	1	1
Guadeloupe	1	1	1	1	1
Haiti	1	1	1	1	1
Iceland	1	1	1	1	1
Isle of Man	1	1	1	1	1
Jersey	1	1	1	1	1
Kuwait	1	1	1	1	1
Lebanon	1	1	1	1	1
Malta	1	1	1	1	1
Martinique	1	1	1	1	1
Montserrat	1	1	1	1	1
New Zealand	1	1	1	1	1
North Korea	1	1	1	1	1
Rwanda	1	1	1	1	1
Saint Kitts and Nevis	1	1	1	1	1
Saint Lucia	1	1	1	1	1
Saint Martin	1	1	1	1	1
Saint Vincent and the Grenadines	1	1	1	1	1
Slovenia	1	1	1	1	1
Tunisia	1	1	1	1	1
Turks and Caicos Islands	1	1	1	1	1
U.S. Virgin Islands	1	1	1	1	1
American Samoa	1	1	0	1	0
Anguilla	1	1	0	1	0
Aruba	1	1	0	1	0
Bahrain	1	1	0	1	0
Cape Verde Islands	1	1	0	1	0
Cocos (Keeling) Islands	1	1	0	1	0
Faroe Islands	1	1	0	1	0
Gibraltar	1	1	0	1	0
Greenland	1	1	0	1	0
Guam	1	1	0	1	0
Kiribati	1	1	0	1	0
Maldives	1	1	0	1	0
Marshall Islands	1	1	0	1	0
Mauritius	1	1	0	1	0
Monaco	1	1	0	1	0
Nauru	1	1	0	1	0
Niue	1	1	0	1	0
Norfolk Island	1	1	0	1	0
Qatar	1	1	0	1	0
RÃ©union	1	1	0	1	0
Samoa	1	1	0	1	0
San Marino	1	0	0	0	0
Seychelles	1	1	0	1	0
Singapore	1	1	0	1	0
Tokelau	1	1	0	1	0
Tuvalu	1	1	0	1	0
United Arab Emirates	1	1	0	1	0
Grand Total 1	7410
1: Total here does not equal total languages intersected for entire dataset as some languages occur in multiple countries.
Total Languages: 7,117
Total Indigenous Languages defined by Polygons: 6,474
Language Dataset: Ethnologue, 23rd edition
